1  
2  
3  
4  
5  
6  
7  
8  
9  
10  
11  
12  
13  
14

# Phase separation of TPX2 enhances and spatially coordinates microtubule nucleation

**Authors:** Matthew R. King<sup>1</sup> and Sabine Petry<sup>1\*</sup>

**Affiliations:**

<sup>1</sup>Department of Molecular Biology, Princeton University, Princeton, NJ 08544, USA

\*Contact Information: [spetry@princeton.edu](mailto:spetry@princeton.edu), phone: 609-258-1553, fax: 609-258-1035

15 **Abstract**

16 Phase separation of substrates and effectors is proposed to enhance biological reaction rates and  
17 efficiency. TPX2 is an effector of microtubule nucleation in spindles, and functions with the  
18 substrate tubulin by an unknown mechanism. Here, we show that TPX2 phase separates into a  
19 co-condensate with tubulin, which mediates microtubule nucleation *in vitro* and in isolated  
20 cytosol. TPX2-tubulin co-condensation preferentially occurs on pre-existing microtubules at the  
21 endogenous and physiologically relevant concentration of TPX2. Truncation and chimera versions  
22 of TPX2 directly demonstrate that TPX2-tubulin co-condensation enhances the efficiency of  
23 TPX2-mediated microtubule nucleation. Finally, the known inhibitor of TPX2, the importin- $\alpha/\beta$   
24 heterodimer, regulates both co-condensation and activity. Our study demonstrates how regulated  
25 phase separation can simultaneously enhance reaction efficiency and spatially coordinate  
26 microtubule nucleation, which may facilitate rapid and accurate spindle formation.

27

28

## 29 **Introduction**

30           The microtubule (MT) cytoskeleton organizes the interior of the cell, determines cell shape,  
31 and segregates chromosomes. Underlying its timely and accurate formation are multiple MT  
32 nucleation pathways from various cellular locations that need to be turned on at the right cell cycle  
33 stage. Only few pathway-specific MT nucleation effectors are known and their molecular  
34 mechanisms remain poorly understood (Petry, 2016; Tovey and Conduit, 2018) . At the same time,  
35 pioneering *in vitro* studies have implicated a role for liquid-liquid phase separation (LLPS) of  
36 proteins in cytoskeletal assembly (Hernández-Vega et al., 2017; Jiang et al., 2015; Li et al., 2012;  
37 Su et al., 2016; Woodruff et al., 2017), but the exact physiological contribution remains unclear.  
38 More generally, many proteins have been shown to undergo LLPS *in vitro*, while functional roles  
39 of LLPS in cells remain to be discovered (Banani et al., 2017; Shin and Brangwynne, 2017).

40           Branching MT nucleation is a recently identified pathway during which new MTs nucleate  
41 along the lattice of pre-existing ones (Petry et al., 2013). It exponentially increases MT numbers  
42 while preserving their polarity and is critical for rapid and accurate spindle assembly (Decker et  
43 al., 2018; Kaye et al., 2018; Petry et al., 2013). Branching MT nucleation requires the universal  
44 MT nucleator module, consisting of the  $\gamma$ -Tubulin Ring Complex ( $\gamma$ -TuRC) (Oegema et al., 1999;  
45 Zheng et al., 1995) and its recently discovered co-factor XMAP215 (Flor-Parra et al., 2018;  
46 Gunzelmann et al., 2018; Thawani et al., 2018), as well as the protein complex augmin that directly  
47 recruits  $\gamma$ -TuRC along the length of a pre-existing MT (Song et al., 2018). Branching MT  
48 nucleation is initiated by the microtubule associated protein TPX2 (Petry et al., 2013), which has  
49 been proposed to activate  $\gamma$ -TuRC via TPX2's C-terminal domain (Alfaro-Aco et al., 2017;  
50 Scrofani et al., 2015). *In vitro*, TPX2 can directly generate MTs from tubulin via its N-terminal  
51 domain (Roostalu et al., 2015; Schatz et al., 2003), but this domain is dispensable for MT

52 nucleation in cytosol (Alfaro-Aco et al., 2017; Brunet et al., 2004). Understanding how TPX2  
53 stimulates MT nucleation could help pioneer how a specific MT nucleation pathway is turned on  
54 in order to build cellular MT structures such as the mitotic spindle.

55 Here, we show that TPX2 undergoes phase separation to form a co-condensate with tubulin  
56 at its endogenous and physiologically relevant concentration in *Xenopus* egg cytosol. The co-  
57 condensation of TPX2 and tubulin occurs on microtubules and thus helps to specifically promote  
58 MT nucleation from pre-existing MTs and enhance MT nucleation rates in cytosol. Lastly,  
59 importins regulate this process by inhibiting the formation of co-condensates. Collectively, these  
60 data provide a molecular mechanism for TPX2 function which is not only critical to explain spindle  
61 assembly, but also demonstrates that phase separation can spatially coordinate reactions and  
62 enhance reaction kinetics in a physiological context.

63

## 64 **Results**

### 65 *TPX2 forms a co-condensate with tubulin in vitro and in cytosol*

66 When characterizing TPX2, we noticed features of known phase separating proteins: a  
67 disordered N-terminus and a more ordered C-terminus with potentially multivalent alpha-helical  
68 regions (Alfaro-Aco et al., 2017) (Fig. 1A). When either GFP-tagged or untagged TPX2 in high  
69 salt buffer was introduced to physiological salt levels, spherical condensates formed (Fig. 1B).  
70 These condensates fulfill several criteria of LLPS: they fuse, exhibit salt- and concentration-  
71 dependent condensation, and show fluorescence recovery that saturates over time (Fig. S1A-C,  
72 Movie S1).

73 We hypothesized that TPX2 may interact with tubulin dimers as a co-condensate because  
74 the two do not interact as mono-dispersed proteins yet form ‘clusters’ that nucleate MTs both *in*

75 *vitro* (Alfaro-Aco et al., 2017; Roostalu et al., 2015; Schatz et al., 2003) and in cells (Brunet et al.,  
76 2008; Ma et al., 2010; Tulu et al., 2006). Indeed, TPX2 forms a co-condensate with tubulin that  
77 generates MTs (Fig. 1C-D), forming an aster similar to those previously observed *in vitro* (Schatz  
78 et al., 2003). Importantly, TPX2 selectively co-condenses with tubulin but not with a protein of  
79 similar size and charge (Figure S1D), demonstrating that TPX2 and tubulin specifically form MT-  
80 nucleation competent co-condensates.

81 To investigate the function of TPX2-tubulin co-condensation in a physiological context,  
82 pre-formed TPX2 condensates were overlaid with meiotic *Xenopus laevis* egg cytosol containing  
83 soluble tubulin (Fig. 1E). TPX2 condensates selectively enriched tubulin from the isolated cytosol  
84 and generated branched MT networks (Fig. 1F, S2A). The tubulin signal in the condensates  
85 diminished as they generated branched MT networks (Fig. S2B), but not as a result of  
86 photobleaching (Fig. S2C). The physiological behavior of TPX2 to generate branched MT  
87 networks could only be observed with non-aged, liquid-like TPX2 condensates, but not with TPX2  
88 condensates that had hardened after aging (Fig. S1C and S2D-F). The latter condensates still  
89 enriched tubulin and generated either aster-like MT arrays (when aged 15 min, Fig. S2E) or no  
90 visible MTs (when aged 30 min, Fig. S2F). In addition, we added mono-dispersed GFP-TPX2 to  
91 meiotic *Xenopus laevis* egg cytosol, which, in this reaction, stimulates the formation of branching  
92 MT nucleation and binds to emerging MTs (Fig. 1G-H, Movie S2). Collectively our observations  
93 demonstrate that TPX2 and tubulin can undergo LLPS to form a co-condensate capable of  
94 generating MTs *in vitro* and in cytosol. These data reconcile previous observations of TPX2-  
95 tubulin ‘clusters’ and provide a mechanistic framework for how the two proteins may functionally  
96 interact.

97

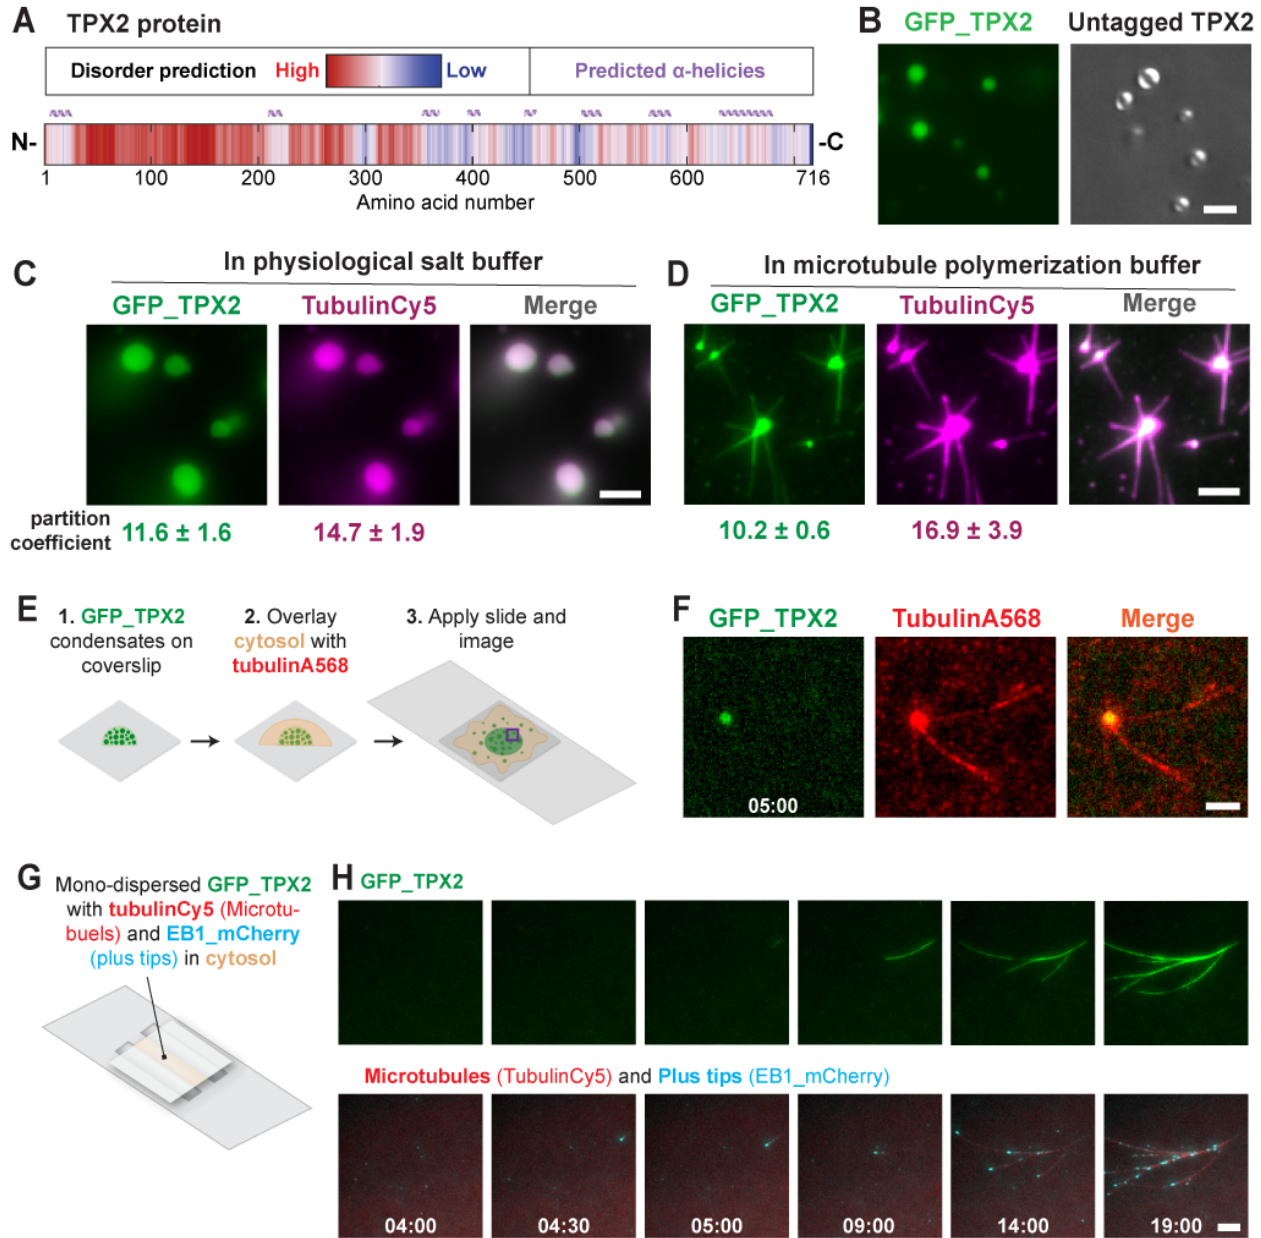

98  
99

100 **Figure 1: TPX2 forms a co-condensate with tubulin *in vitro* and in cytosol**  
 101 (A) Intrinsic disorder and secondary structure predictions in TPX2. (B) Epifluorescent image of  
 102 GFP-TPX2 condensates (See Movie S1) (left) and DIC image of untagged TPX2 condensates  
 103 (right) (C) Epifluorescent image of GFP-TPX2 condensates prepared with Cy5-labeled tubulin  
 104 (both at 4  $\mu$ M) in a flow chamber (see figure S1D for control) (D) TIRF image of TPX2-Tubulin  
 105 co-condensates (1 and 10  $\mu$ M, respectively) prepared in MT polymerization buffer in a flow  
 106 chamber, 18 minutes after reaction started. (E) Experimental set up for (F). Purple square  
 107 roughly indicates area imaged. (F) Oblique-TIRF microscopy of GFP-TPX2 and tubulin  
 108 (Alexa568-labeled) taken 5 minutes after reaction started (minutes:seconds). See also Figure S2  
 109 for additional time-points and additional treatments. (G) Experimental set up for (H) and (Fig.  
 110 2C): mono-dispersed GFP-TPX2 (500nM) and Alexa568-labeled tubulin mixed with *Xenopus*  
 111 meiotic egg cytosol and imaged via oblique-TIRF microscopy in a flow chamber (H) GFP-TPX2

112 localization to growing MT-network imaged over time (minutes:seconds) in cytosol (see Movie  
113 S2). Microtubules are labeled red and growing plus-tips are blue. All scale bars are 3  $\mu\text{m}$  and  
114 TPX2 was [2 $\mu\text{M}$ ] unless indicated. Partition coefficient values are mean with  $\pm 1$  standard  
115 deviation (SD). Data shown are representative of at least three experimental replicates.

116

117

118 *TPX2-tubulin co-condensates form on MTs at the endogenous and physiologically relevant*  
119 *concentration of TPX2*

120 To further investigate the functional significance of TPX2-tubulin co-condensation, we  
121 mapped the phase boundary of TPX2 via partition coefficient (Fig. S3A-B) and soluble pool  
122 measurements (Fig. S3C). Interestingly, tubulin lowers the concentration at which TPX2 phase  
123 separates from  $\sim 200\text{nM}$  to  $\sim 50\text{nM}$ , which, compellingly, corresponds to the estimated  
124 concentration range for endogenous TPX2 in *Xenopus laevis* egg cytosol of 30-100nM (Fig. S3A-  
125 C) (Wühr et al., 2014). Surprisingly, TPX2 localizes to microtubules at the much lower  
126 concentration of 1nM (Fig. 2A-B), which is 50-fold lower than the TPX2 phase boundary in the  
127 presence of tubulin in solution (Fig. S2A-E). This suggests that TPX2 prefers to bind to MTs over  
128 associating with itself or tubulin in solution. Interestingly, MT-localized TPX2 can still  
129 specifically recruit soluble tubulin along the length of MTs (Fig. 2A, S3F). Moreover, this occurs  
130 at the same concentration of 50nM TPX2 that corresponds to the phase boundary of TPX2-tubulin  
131 co-condensation in solution (Fig. 2B, S3D-E), indicating that TPX2-tubulin co-condensates form  
132 on MTs. Based on these results, we hypothesized that the only condition, at which TPX2-tubulin  
133 co-condensates can form in solution and not on MTs is if MT formation is prevented. Indeed, when  
134 MT polymerization in cytosol was inhibited via nocodazole, mono-dispersed TPX2 and tubulin  
135 formed small, spherical, and highly mobile TPX2-tubulin co-condensates (Fig. 2C, Movie S3).  
136 These are reminiscent of nocodazole-induced TPX2 ‘puncta’ previously observed in cells (Ma et

137 al., 2010; Tulu et al., 2006). In sum, our evidence suggests that TPX2-tubulin co-condensates form  
138 on MTs, rather than in solution.

139 To determine whether these observations are important for TPX2 function, we first  
140 determined the physiologically relevant concentration of TPX2 for mediating branching MT  
141 nucleation. Endogenous TPX2 was removed by immunodepletion from cytosol and mono-  
142 dispersed, recombinant TPX2 was added at various concentrations. The resulting MT nucleation  
143 kinetics of branched MT networks were measured (Figure 2D-F, Movie S4) and plotted as a  
144 function of TPX2 concentration (Figure 2E). TPX2 increases the rate of MT nucleation roughly  
145 100-fold (Table 1) in a switch-like fashion within a concentration range of 25-100nM (Fig. 2F).  
146 Strikingly, this concentration range precisely matches the endogenous TPX2 levels, and most  
147 importantly, the phase boundary of TPX2-tubulin co-condensates, which are expected to be  
148 exclusively localized along MTs at this concentration. Collectively, these observations suggest  
149 that TPX2-tubulin co-condensation on a MT could underlie TPX2's switch-like activation of  
150 branching MT nucleation, as well as spatially bias MT nucleation to occur exclusively from pre-  
151 existing MTs.



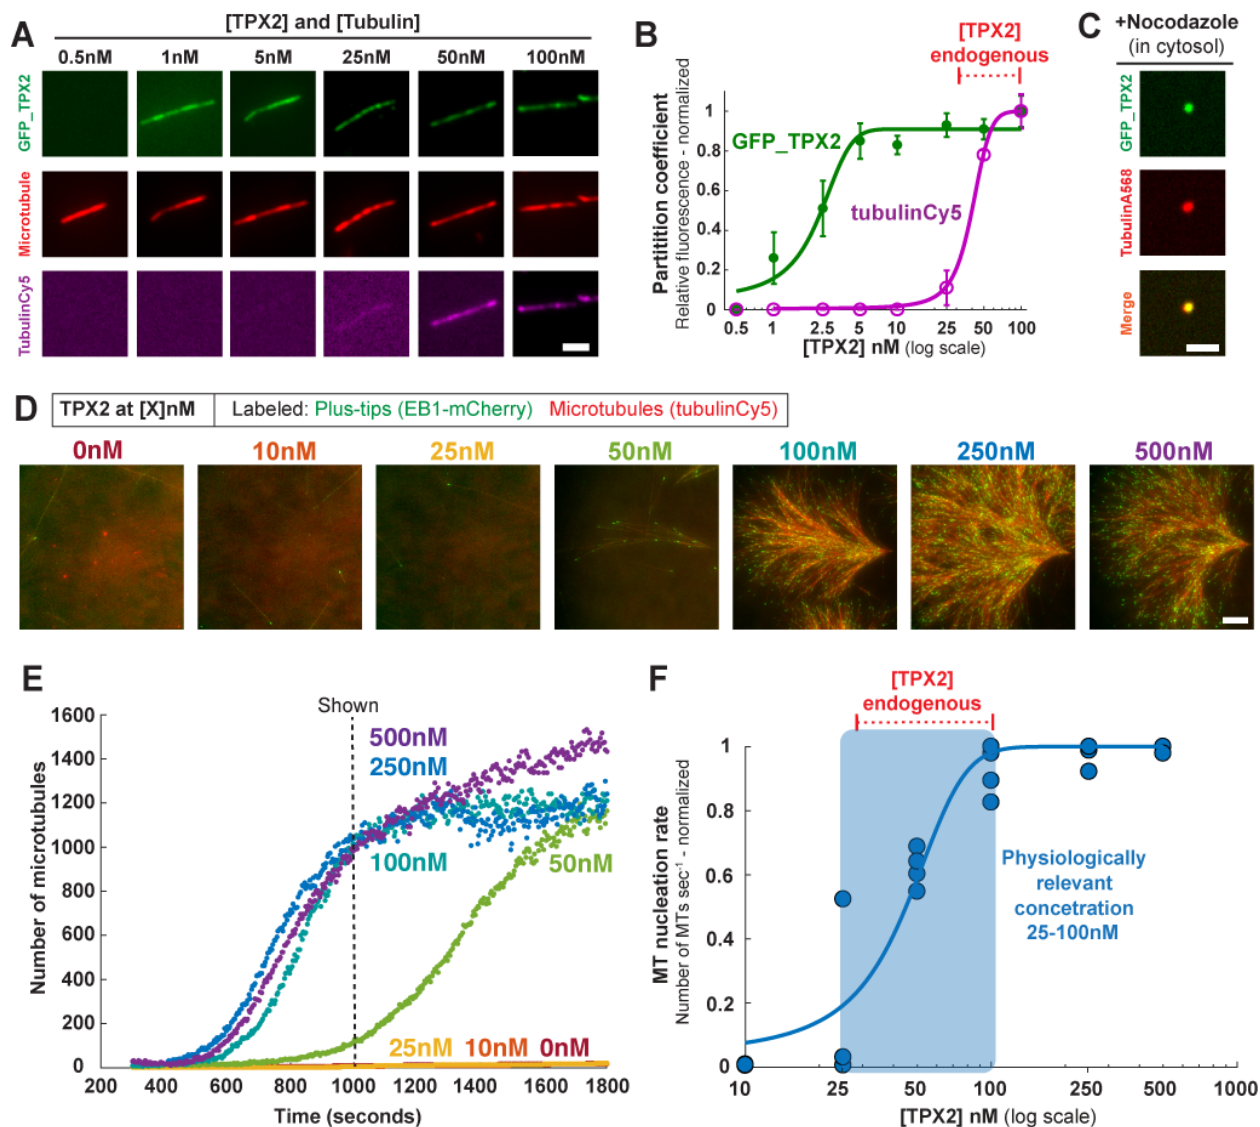

152

153 **Figure 2: TPX2-tubulin co-condensates form on MTs at the endogenous and**  
 154 **physiologically relevant concentration of TPX2**

155 (A) TIRF images (contrast-optimized) and (B) quantification of GFP-TPX2 and Cy5-labeled  
 156 tubulin (at indicated concentrations, both proteins equimolar) localized to pre-formed  
 157 microtubules (Alexa568-labeled, GMPCPP stabilized) and spun down onto coverslips; scale bar,  
 158 3  $\mu$ m. Mean normalized to maximum signal and SEM of three replicate experiments (error bars)  
 159 shown. See Figure S3 for comparison to in solution TPX2-tubulin co-condensation. (C) GFP-  
 160 TPX2 and Alexa568-labeled tubulin co-localization in cytosol treated with Nocodazole to  
 161 prevent MT polymerization. See Fig. 1G for experimental set up. Images taken 10 minutes into  
 162 reaction (see Movie S3). Scale bar is 3  $\mu$ m and TPX2 and tubulin were [2 $\mu$ M]. (D) TIRF images  
 163 and (E) quantification of TPX2-mediated branching MT nucleation in *Xenopus* meiotic cytosol  
 164 at indicated concentrations of TPX2. Shown images were taken at 1000 seconds (indicated) Cy5-  
 165 labeled tubulin (red) and mCherry-EB1 (green) highlight microtubules and growing microtubule  
 166 plus ends, respectively; Scale bar, 10 $\mu$ m. See also Movie S4. (F) Rate of MT nucleation as a  
 167 function of TPX2 concentration for 4 independent replicates of data shown in (D) and (E). See

168 also table 1. Rates normalized to maximum rate within an experiment. Line of best fit shown and  
169 approximate physiologically relevant range (25-100nM) highlighted. Endogenous concentration  
170 range of TPX2 (30-100 nM) indicated (also in B).

171  
172  
173

| [TPX2] (nM) | Fold change in rate<br>(relative to 0nM) | Range<br>(of replicates) |
|-------------|------------------------------------------|--------------------------|
| 0           | 1                                        | 1                        |
| 10          | 1                                        | 0.9-1.2                  |
| 25          | 20                                       | 1-56                     |
| 50          | 81                                       | 60-97                    |
| 100         | 130                                      | 90-165                   |
| 250         | 133                                      | 93-174                   |
| 500         | 137                                      | 100-178                  |

174

175 **Table 1. MT nucleation rates of full length TPX2**

176 Fold change in rates of MT nucleation relative to no TPX2 added (0nM). Rates were normalized  
177 to a rate of 1 in the 0nM condition within each experimental set and these values were averaged  
178 across replicate sets (2<sup>nd</sup> column). Range of fold-change values shown of the experimental  
179 replicate sets (three or four total measurements were obtained per concentration among four  
180 replicate sets). Rates for each concentration are also displayed as individual points in Fig. 2F.

181

182

183 *The N-terminal region of TPX2 promotes condensation and enhances branching MT nucleation*  
184 *efficiency*

185 To determine how TPX2-tubulin co-condensation contributes to branching MT nucleation,  
186 we first tested various truncations of TPX2. While co-condensation was not completely abrogated  
187 in any truncation, the disordered N-terminal constructs phase separated at much lower  
188 concentrations and had greater tubulin partition coefficients than C-terminal constructs (Fig. 3A-  
189 C, S4A-D). Although the N-terminal 1-480aa region drives the majority of TPX2 phase transition  
190 and tubulin co-condensation, it alone does not stimulate branching MT nucleation, while the  
191 minimal fragment that retains branching activity is TPX2's C-terminal 480-716aa (Fig. 3D, S4E-

192 F, Movie S5) (Alfaro-Aco et al., 2017). Yet, while not functional on its own, within the context of  
 193 the full-length protein, the N-terminal region of TPX2 enhances the efficiency of MT nucleation  
 194 about 10-fold (Fig. 3E).

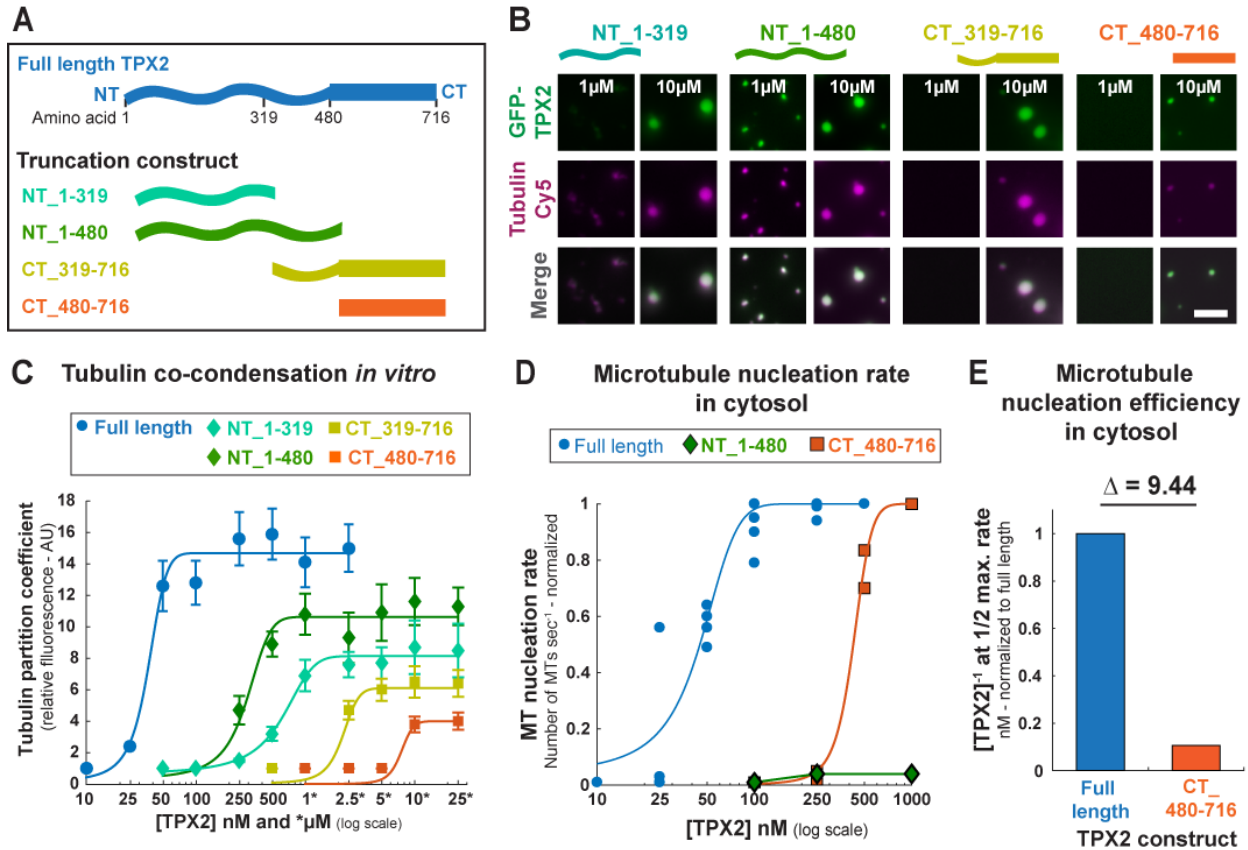

195

196 **Figure 3: The N-terminal region of TPX2 promotes condensation and enhances branching**  
 197 **MT nucleation efficiency**

198 **(A)** Schematic of full-length TPX2 and various N-terminal and C-terminal truncations constructs  
 199 used. **(B)** Epifluorescent images of GFP-TPX2 and tubulinCy5 co-condensates at 1  $\mu$ M and  
 200 10  $\mu$ M (equimolar concentration) for indicated TPX2 truncation construct. **(C)** Quantification of  
 201 relative tubulin signal in co-condensate (partition coefficient) as a function of TPX2  
 202 concentration. Mean values with  $\pm 1$  SD as error bars from a representative experiment are  
 203 plotted and a line fit. See also Figure S4A-D for partition coefficient measures of GFP-TPX2  
 204 signal. **(D)** Rate of MT nucleation as a function of TPX2 concentration for indicated constructs.  
 205 Full-length data previously shown (Fig. 2E). Rates for each concentration of a given construct  
 206 are normalized to the maximum rate of that construct (absolute maximum rates between all  
 207 constructs are in a  $\pm 2x$  range). Lines of best fit shown. See also Figure S4E-F for individual rate  
 208 curves and movie S5. **(E)** Different efficiencies of MT nucleation for the full-length and  
 209 CT\_480-716 TPX2 construct. Efficiency values are the inverse of the TPX2 concentration at  
 210 which half the maximum rate of MT nucleation is achieved ( $[\text{TPX2}]^{-1}$  at  $\text{Rate}_{1/2\text{Max}}$ ) efficiency

211 values were normalized to full-length (efficiency of 1). The difference (fold change) in  
212 efficiencies is shown ( $\Delta$ ).

213

214

### 215 *TPX2-tubulin co-condensation underlies efficient branching MT nucleation*

216 Next, we researched the mechanism by which TPX2 stimulates branching MT nucleation  
217 and the precise role of TPX2-tubulin co-condensation in this process. To do this, we replaced the  
218 N-terminal 1-480aa with various heterologous regions to generate TPX2 chimeras with distinct  
219 functionalities (Fig. 4A). We tested the ability of these chimeras to co-condense with tubulin (Fig.  
220 4B) and promote branching MT nucleation (Fig. 4C). Due to the presence of the C-terminal  
221 minimal fragment (CT\_480-716) (Alfaro-Aco et al., 2017), all of the chimeras were still capable  
222 of eliciting branching MT nucleation with reduced MT nucleation efficiency.

223 Neither the chimera containing an N-terminal region that confers only phase separation but  
224 no additional tubulin condensation (IDR\_NoTB, i.e. the intrinsically disordered region (IDR) of  
225 FUS), nor one that only associates with tubulin via two ordered TOG domains but does not phase  
226 separate (NoIDR\_TB, i.e. TOG domains 1 and 2 from XMAP215), changed the reduced MT  
227 nucleation efficiency of CT-TPX2 (Fig. 4B-D, S5A-D, Movie S6). Next, the intrinsically  
228 disordered region of the MT binding protein BugZ was used. This BugZ domain phase separates  
229 and has a similar pI to the endogenous TPX2 N-terminus (IDR\_TB), but does not independently  
230 promote branching MT nucleation (Fig. S5E). Remarkably, this chimera recapitulated the TPX2-  
231 tubulin co-condensation property of full length TPX2 (Fig. 4B, S5F) and, most importantly,  
232 rescued the ~10-fold loss in MT nucleation efficiency in cytosol that arises without the endogenous  
233 N-terminal 1-480aa region (Fig. 4C-D, S6G, Movie S7).

234           Within TPX2, both aromatic and charged residues are highly conserved (Fig. S6A).  
235   Aromatic residues have been implicated in tubulin condensation of the microtubule associated  
236   protein BuGZ (Jiang et al., 2015), however their removal from TPX2 does not alter tubulin co-  
237   condensation (Fig. S6B-D). We hypothesized that the abundant and conserved charged residues  
238   may mediate tubulin co-condensation and efficiency of branching MT nucleation. To directly test  
239   this, we created a chimera using a synthetic peptide (Syn\_Pos) that replicated both the positive  
240   charge and intrinsic disorder of the endogenous TPX2 region (Fig. 4A). Again, this chimera fully  
241   rescued TPX2-tubulin co-condensation and the MT nucleation efficiency of full-length TPX2 (Fig.  
242   4B-C, S6E-F). Critically, the gain-of-function chimeras (IDR\_TB-CT-TPX2 and Syn\_Pos-CT-  
243   TPX2) specifically discern tubulin co-condensation as the underlying property that enables the  
244   physiological role of TPX2, namely, to mediate branching MT nucleation in its endogenous range  
245   (Fig. 4D).

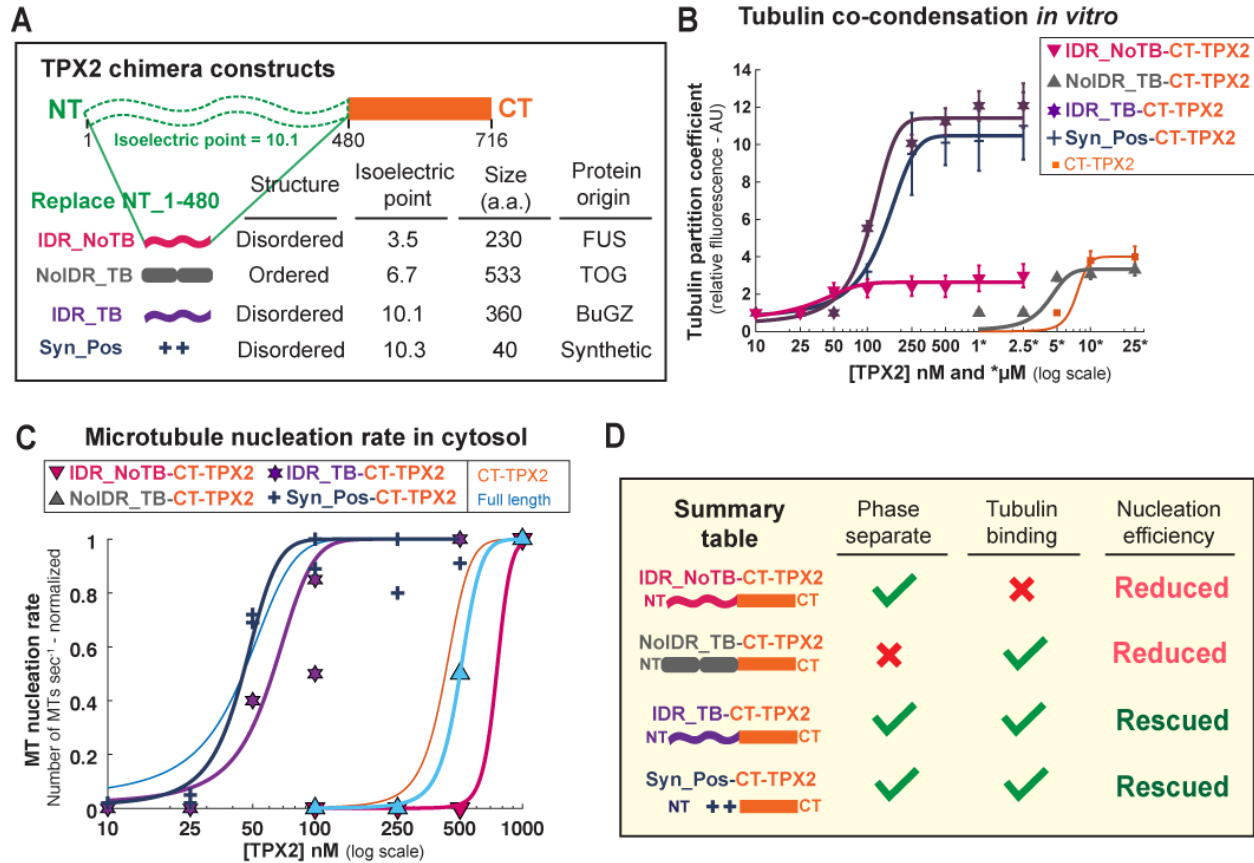

246

247 **Figure 4: TPX2-tubulin co-condensation underlies efficient branching MT nucleation**  
 248 (A) Schematic of chimera design: the endogenous N-terminal 1-480aa of TPX2 are replaced with  
 249 exogenous domains containing distinct features shown in table. (B) Quantification of tubulin  
 250 partition coefficient as a function of TPX2-concentration. For partition coefficient graphs mean  
 251 values with  $\pm 1$  SD as error bars from a representative experiment are plotted and a line fit. See  
 252 also Figure S6A-B, E-F for partition coefficients of TPX2. (C) Rate of MT nucleation as a  
 253 function of TPX2 concentration for indicated constructs. Rates for each concentration of a given  
 254 construct are normalized to the maximum rate of that construct (absolute maximum rates  
 255 between all constructs are in a  $\pm 2x$  range). Lines of best fit shown. Data for Full-length (Fig.'s  
 256 2E and 3D) and CT\_TPX2 (Fig. 3D) were previously shown. See also Figure S6C-D, H-I for  
 257 individual rate curves and movies S6 and 7. (D) Summary table of results. MT nucleation  
 258 efficiencies are relative to full-length TPX2.  
 259

260

261 *Importins  $\alpha/\beta$  inhibit TPX2 condensation and activity*

262 Given the importance of TPX2-TB co-condensation to branching MT nucleation, we next  
 263 sought to determine if the property was functionally regulated. The importin- $\alpha/\beta$  heterodimer



264 inhibits TPX2 until it is released by RanGTP at the onset of mitosis (Clarke and Zhang, 2008).  
 265 Because RanGTP exists as a gradient emanating from chromosomes, the effective concentration  
 266 of importins- $\alpha/\beta$  is low near chromosomes but increases further away into the spindle (Clarke and  
 267 Zhang, 2008). Correspondingly, we find that importins- $\alpha/\beta$  reduce both TPX2-tubulin co-  
 268 condensation *in vitro* and TPX2-mediated MT nucleation in cytosol in a concentration-dependent  
 269 manner: at 2-fold excess importins- $\alpha/\beta$  and higher, both are abrogated (Fig. 5A-E, Movie S8). It  
 270 was previously determined that the gradient of active importins- $\alpha/\beta$  results in a sharp boundary of  
 271 MT-nucleation a certain distance away from chromosomes (Kaye et al., 2018), and this distance  
 272 can be modulated by altering global levels of TPX2 (Oh et al., 2016). Our findings indicate that  
 273 this sharp MT-nucleation boundary could be due to TPX2-tubulin co-condensation and its  
 274 threshold regulation by importins- $\alpha/\beta$ .

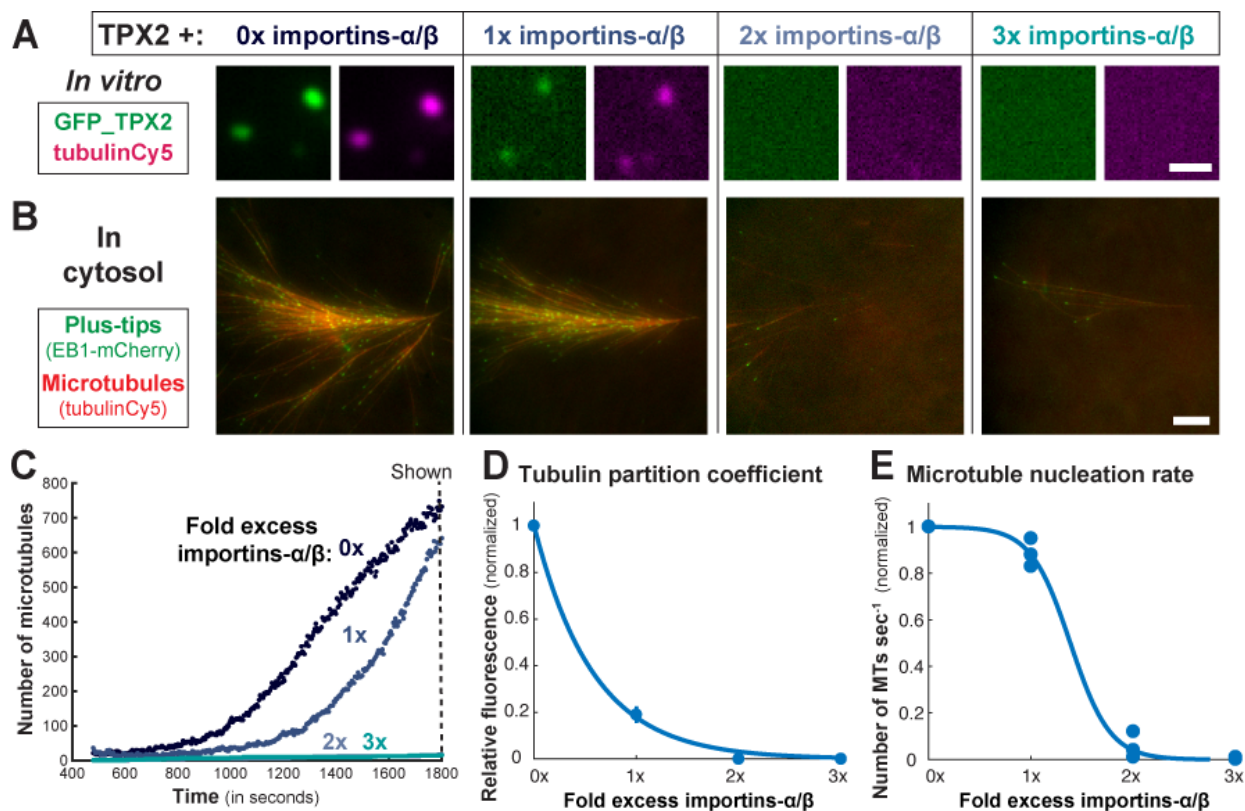

275

276 **Figure 5: Importins  $\alpha/\beta$  inhibit TPX2 condensation and activity**

277 **(A)** Epifluorescent images of TPX2-tubulin co-condensates *in vitro* prepared with importins- $\alpha/\beta$   
278 at indicated excess (0x = no importins- $\alpha/\beta$ ) TPX2 and tubulin both at 500 nM. Scale bar, 1 $\mu$ m.  
279 **(B)** TIRF Images of TPX2-mediated MT nucleation in *Xenopus* meiotic cytosol with TPX2 and  
280 importins- $\alpha/\beta$  added at 100nM TPX2 and indicated excess of importins- $\alpha/\beta$ . Cy5-labeled tubulin  
281 (red) and mCherry-EB1 (green) highlight microtubules and growing microtubule plus ends,  
282 respectively. Images taken at 1800 Seconds. Scale bar, 10 $\mu$ m. See Movie S8. **(C)** Quantification  
283 of data in **(B)**. **(D)** Quantification of relative tubulin signal (partition coefficient) as a function of  
284 excess importins- $\alpha/\beta$ . Mean values with  $\pm 1$  SD as error bars shown. **(E)** Rate of MT nucleation  
285 as a function of excess importins- $\alpha/\beta$ , normalized to 0x importins- $\alpha/\beta$ , Data pooled from three  
286 experimental replicates of **(B and C)**. Line of best fit shown.

287

## 288 **Discussion**

289 Our work elucidates how TPX2 and tubulin interact on a pre-existing MT, which provides  
290 a potential mechanism for TPX2's ability to specifically stimulate branching MT nucleation. More  
291 broadly, our findings serve as a proof-of-concept that phase separation can spatially coordinate  
292 and enhance reactions in a physiological context.

293 TPX2 and tubulin interact via LLPS driven by electrostatic residues located primarily in  
294 the N-terminal 1-480aa of TPX2. TPX2-tubulin co-condensates preferentially form on pre-existing  
295 MTs and at a threshold concentration of TPX2 (~50nM) that corresponds to its endogenous and  
296 physiologically relevant concentration. This suggests that TPX2 pools tubulin via phase separation  
297 to create a local reservoir along the length of a MT (Fig. 6, right box) and that this is necessary to  
298 stimulate branching MT nucleation in an all-or-none fashion (Fig. 6, graph). Importantly,  
299 branching MT nucleation requires the C-terminal 480-716aa of TPX2 which may function through  
300 an interaction with  $\gamma$ -TuRC (Alfaro-Aco et al., 2017; Scrofani et al., 2015) and its co-nucleation  
301 factor XMAP215 (Flor-Parra et al., 2018; Gunzelmann et al., 2018; Roostalu et al., 2015; Thawani  
302 et al., 2018; Woodruff et al., 2017). Moreover, branching MT nucleation requires the augmin  
303 complex, which directly localizes  $\gamma$ -TuRC to pre-existing MTs (Song et al., 2018). Thus, while



304 multiple proteins are essential for branching MT nucleation, our results suggest a critical role for  
305 TPX2 condensation.

306

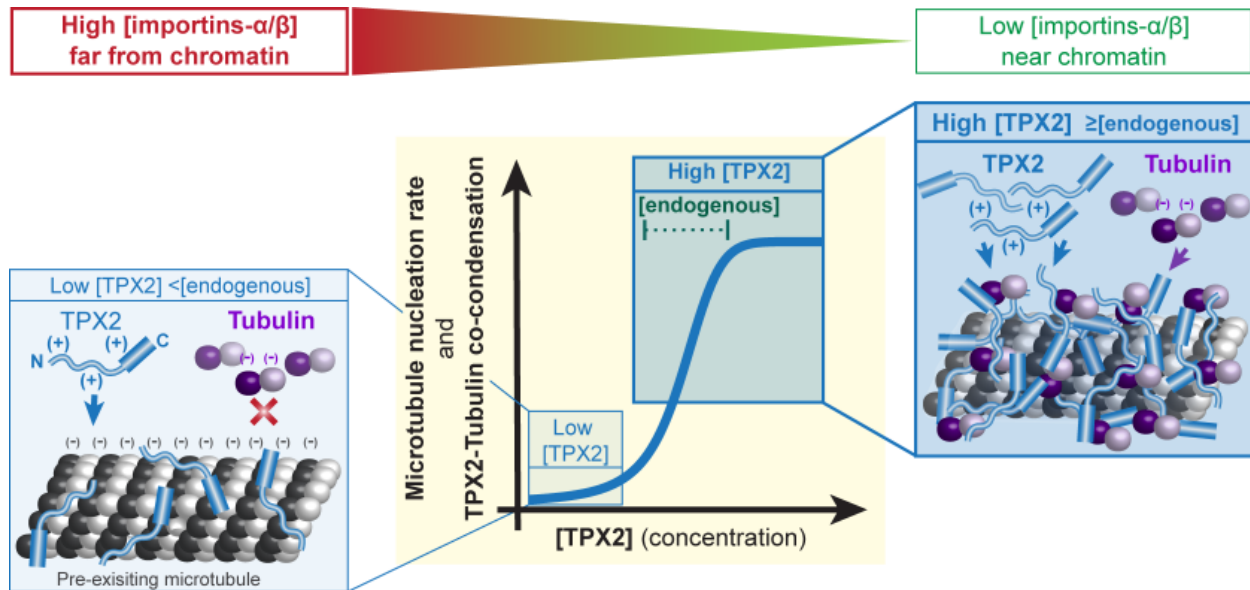

307

### 308 **Figure 6: Model**

309 Left side cartoon: At low concentrations ( $<$ endogenous) TPX2 localizes to MTs but does not  
310 recruit soluble tubulin, likely due to electrostatic repulsion (denoted by '+' and '-'). Right side  
311 cartoon: At high concentrations of TPX2 ( $\geq$  endogenous) TPX2 co-localizes with soluble tubulin  
312 on microtubules. Center: graphical abstraction of data demonstrating that TPX2 promotes  
313 branching MT nucleation (in cytosol) and forms a co-condensate with tubulin (*in vitro*) in a  
314 switch-like fashion at or above its endogenous concentration. Top gradient: relative importin- $\alpha/\beta$   
315 levels existing as a gradient around chromosomes also affect TPX2-tubulin co-condensation and  
316 TPX2-mediated branching MT nucleation.

317

318 Loss of TPX2 results in reduction of spindle microtubule mass and mitotic delay  
319 (Neumayer et al., 2014), which is early embryonic lethal in mice (Aguirre-Portolés et al., 2012)  
320 and causes apoptosis in proliferative somatic cells (Neumann et al., 2010). TPX2 overexpression  
321 leads to aberrant additional puncta of MT nucleation (Brunet et al., 2008; Ma et al., 2010) that our  
322 data suggests correspond to TPX2-tubulin condensates. Furthermore, TPX2 overexpression is  
323 observed in 27% of all cancer types (Neumayer et al., 2014) and the degree of TPX2  
324 overexpression tightly correlates with disease lethality (Carter et al., 2006; Wang et al., 2018). In

325 sum, maintaining appropriate TPX2 levels is essential for healthy cell division. Our work provides  
326 a potential mechanistic framework to understand the relationship between TPX2 levels and its  
327 associated microtubule nucleation activity, which could educate future therapeutic efforts.

328 Almost two decades ago, TPX2 was identified as the major downstream factor of RanGTP  
329 that is required for MT generation from chromatin, but the molecular mechanism of its regulation  
330 has remained unclear (Gruss et al., 2001; Neumayer et al., 2014). Our observation of complete  
331 inhibition of both TPX2-tubulin co-condensation and TPX2-mediated MT nucleation by  
332 importins- $\alpha/\beta$  could explain how TPX2 coordinates a sharp boundary of nucleation a certain  
333 distance from chromatin within the spindle (Fig. 6, above graph) (Kaye et al., 2018; Oh et al.,  
334 2016). Phase separation as a means to convert gradient signals into binary responses has  
335 implications for many biological processes including signaling and morphogenesis (Csizmek et  
336 al., 2016). Collectively our findings suggest that TPX2-tubulin co-condensation is a regulated  
337 process that may underlie the all-or-nothing activation of branching MT nucleation.

338 It has been proposed that phase separated condensates act as reaction crucibles to enhance  
339 rates and efficiency (Banani et al., 2017; Castellana et al., 2014; Shin and Brangwynne, 2017).  
340 This conclusion is based on many *in vitro* studies (Hernández-Vega et al., 2017; Jiang et al., 2015;  
341 Li et al., 2012; Strulson et al., 2012; Su et al., 2016; Woodruff et al., 2017), but remains poorly  
342 understood in a physiological context (Boija et al., 2018; Du and Chen, 2018; Zhao et al., 2015).  
343 Our results demonstrate that phase separation of TPX2 and tubulin improves the efficiency of  
344 branching MT nucleation in cytosol at least 10-fold. The fact that TPX2 selectively phase separates  
345 onto a pre-existing MT enables the autocatalytic amplification of MTs via branching MT  
346 nucleation, which increases MT nucleation rates up to 100-fold. In summary, we established that  
347 phase separation of a MT nucleation effector can enhance both reaction efficiency and rate whilst

348 also spatially coordinating activity. Phase separation mediated mechanisms are likely at play in a  
349 broad set of cellular processes and this will be important to explore in physiological contexts.

350 **Materials and Methods:**

351  
352 *Contact for Reagent and Resource Sharing*  
353 Further information and requests for resources should be directed to and will be fulfilled by lead  
354 contact Dr. Sabine Petry (spetry@princeton.edu)  
355  
356

357 **Protein constructs, expression and purification**

358 *E. Coli* Strains - DH5 $\alpha$  cells (New England Biolabs (NEB): C2987I) were used for all subcloning  
359 steps. Rosseta2 cells (Fisher: 71-403-4) were used to express proteins for purification. Cells were  
360 grown at various volumes in LB Broth (Sigma: L3522) prepared according to supplier's  
361 instructions.

362  
363 Protein constructs – BSA (Fisher: 23209) and Tubulin (PurSolutions LLC: 032005) are bovine  
364 versions and proteins were acquired directly from vendors. FUS and Ran are the human versions.  
365 All remaining proteins are *Xenopus laevis* versions. DNA sequences were sourced from in-house  
366 plasmids, the *Xenopus laevis* Gene Collection (Source Biosciences), synthesized (GenScript,  
367 Sigma) or were gifted (FUS-IDR plasmid was a gift from Cliff Brangwynne).

368 All TXP2 constructs were cloned as N-terminally tagged Strep6xHisGFP-TEV-TPX2 fusions  
369 using a modified pST50 vector (Tan et al., 2005) and cloned via Gibson assembly (NEB: E2611L).  
370 An identical strategy was used to generate StrHisTEV-mCherry-FL\_TPX2 , StrHisBFP-TEV-  
371 IDR\_TB, StrHisBFP-TEV-RanQ69L, EB1-mCherry6xHis (27), GST-importin  $\alpha$ , and GST-  
372 importin  $\beta$ . Insert fragments were PCR amplified from plasmids containing the indicated gene  
373 which was unmodified from its wild type sequence. Exceptions are: Ran, which has a single site  
374 mutation Q69L to render it dominant positive, and NT $\Delta$ YF\_TPX2 and Syn\_Pos-CT\_TPX2 which  
375 were both custom synthesized (Genscript (NT $\Delta$ YF) and Sigma (Syn\_Pos): personal quote). The  
376 Syn\_Pos (synthetic positive) protein sequence is:

377 AKKRKAGDSEGSEGAKKRKA AKKRKAGDSEGSEGAKKRKA. This sequence was  
378 generated by interspacing nuclear localization-like sequences (e.g. KKRK) with inert a.a.'s G, S,  
379 A, as well as, oppositely charged E. The construct was designed to have a similar theoretical  
380 isoelectric point (pI) to the endogenous NT1-480aa of TPX2. All constructs were fully sequenced  
381 and confirmed to have no errors.

382

383 Expression and purification - All constructs were transformed into Rosseta2 *E. coli* cells and were  
384 grown in temperature-controlled incubators shaking at 200RPM. For protein expression, cells were  
385 grown at 37°C (0.5-0.7 OD<sub>600</sub>), then cooled to 16°C and induced with 0.75 mM isopropyl-β-D-  
386 thiogalactoside (IPTG) for another 7 hours at 27°C. Cell pellets were collected and flash frozen for  
387 future protein purification.

388 For all TPX2 constructs, cells were lysed using an EmulsiFlex (Avestin) in lysis buffer  
389 (0.05M Tris-HCl, 0.015M Imidazole, 0.75M NaCl, pH 7.75) containing 0.0002M  
390 phenylmethylsulfonyl fluoride (PMSF), 0.006M β-mercaptoethanol (βME), cOmplete™ EDTA-  
391 free Protease Inhibitor tablet (Sigma 5056489001), and 1000U DNase I (Sigma 04716728001).  
392 Lysate was centrifuged in a F21-8x50y rotor using a Sorvall RC6+ at 17,000RPM for 25min.  
393 Clarified lysate was bound to pre-washed Ni-NTA agarose beads (Qiagen 1018236) in a gravity  
394 column and beads were washed with 10 column volumes lysis buffer. Protein was eluted in lysis  
395 buffer containing 200mM Imidazole, and then further purified via gel filtration (Superdex 200  
396 HiLoad 16/600, GE Healthcare – 28-9893-35) in CSF-XB buffer (0.01M Hepes, 0.002M MgCl,  
397 0.0001M CaCl, 0.004M Ethylene glycol-bis(2-aminoethylether)-N,N',N'-tetraacetic acid  
398 (EGTA), 10% w/v sucrose, pH-7.75) containing either 0.1M KCl for extract assays or 0.5M KCl  
399 for condensate assays. Peak fractions were pooled, concentrated (Amicon Ultra, ThermoFisher -  
400 various sizes), flash frozen and stored at -80°C. Untagged TPX2 was generated by cleaving  
401 Strep6xHisGFP-Tev-FL protein with TEV protease at 100:1 TPX2:TEV protease molar ratio  
402 overnight at 4°C while dialyzing into cleavage buffer (0.02M NaPO<sub>4</sub>, 0.5M NaCl, 0.006M βME,  
403 and 0.0002M PMSF, pH -7.5). Cleaved TPX2 was collected as the flow-through of the reaction  
404 mixture added to NiNTA agarose beads.

405 For GST-importin α and GST-importin β, clarified lysates were prepared in the same way  
406 with the exception of the lysis buffer (0.05M Tris-HCl, 0.138M NaCl, 0.0027M KCl pH 8) and  
407 they were bound to a GST affinity column (GSTrap™ Fast Flow, GE Healthcare: 17-5131-02).  
408 The column was washed (0.02M NaPO<sub>4</sub>, 0.15M NaCl, 0.006M βME, and 0.0002M PMSF, pH -  
409 7.5), protein was eluted (0.02M Tris-HCl, 0.15M NaCl, 0.01M L-Glutathione, 0.006M βME, and  
410 0.0002M PMSF, pH – 7.5) and peak fractions were pooled. GST-importin β was cleaved to remove  
411 GST and purified in the same manner as untagged TPX2. Strep6xHisBFP-RanQ69 and EB1-  
412 6xHismCherry were purified as described previously (Alfaro-Aco et al., 2017; Thawani et al.,  
413 2018). Pure tubulin and BSA were labeled with commercial NHS-conjugated dyes (Cy5 or

414 Alexa568) according to supplier's instructions (Sigma: GEPA150101). A similar method was used  
415 to conjugate biotin to tubulin (EZ-Link™ NHS-PEG4-Biotin, ThermoFisher: 21329). Conjugated  
416 tubulin was further purified for MT competent tubulin by a series of MT polymerization and  
417 pelleting rounds. The percentage of labeling was  $\geq 60\%$  for all purifications. In direct comparisons  
418 of fluorescently conjugated proteins (i.e. BSACy5 and tubulinCy5) batches were used that had  
419 matched percentage of labeling.

420 All proteins were flash frozen in CSF-XB buffer at either 0.1M or 0.5M KCl and stored at  
421  $-80^{\circ}\text{C}$ . Before use, all proteins were pre-cleared of aggregates via ultracentrifugation at 80,000  
422 RPM for 15min in a TLA100 rotor in an Optima MAX-XP ultracentrifuge at  $4^{\circ}\text{C}$ . Protein  
423 concentrations were determined by Coomassie-blue densitometry measures of a concentration  
424 series of the protein of interest and a BSA standard run on the same SDS-PAGE gel.

425

## 426 **Image collection and processing**

427 The imaging technique used is indicated in each corresponding figure legend. Total Internal  
428 Reflection Fluorescence (TIRF), Epifluorescence (Epi), and Differential Interference Contrast  
429 (DIC) microscopy methods were carried out on a Nikon TiE microscope with a 100X, 1.49NA oil  
430 immersion objective and an Andor Zyla sCMOS camera. Confocal microscopy was carried out on  
431 a Nikon TiE microscope with a 63X, 1.45NA oil immersion objective, a Yokogawa CSU 21 disk  
432 module and a Hamamatsu ImageEM EM-CCD camera. Fluorescence recovery after  
433 photobleaching (FRAP) was carried out on a Nikon A1 point scanning microscope using a 63X,  
434 1.45NA oil immersion objective. All experiments using *Xenopus* egg cytosol were carried out at  
435  $18^{\circ}\text{C}$  in a temperature-controlled room.

436 NIS-Elements software was used for all image acquisition. All images within a data set  
437 were taken with identical imaging parameters. Binning was not used except in the case of extract  
438 branching MT nucleation assays. FIJI and MATLAB were used for all image analysis. Images  
439 within a figure panel were processed with matched brightness and contrast windows for each color  
440 to allow direct comparison of intensities. In a few cases, enhanced contrast was used to emphasize  
441 non-association events, in which case it was indicated in the legend. These cases include figures  
442 2A, S1D, S3D and F, which have enhanced contrast as the main image only (2A and S3F) or have  
443 an enhanced contrast image in addition to the matched contrast image (S1D and S3). All images  
444 are representative crops. Subtraction of background signal was not used, except in the case of

445 GFP\_TPX2 signal in Fig. 1I. Oblique TIRF was used in these and other cases (indicated in figure  
446 legends) to visualize GFP-TPX2 signal, which cannot be seen in TIRF due to high levels of TPX2  
447 bound to the coverslip.

448

#### 449 **Condensate (phase separation) assays**

450 Standard assay - Proteins were diluted to 5x final concentration in a CSF-XB Buffer containing  
451 500 mM KCl salt, then diluted 1:4 in CSF-XB containing no salt at 4°C to reach a final salt  
452 concentration of 100mM. The reaction mixture was immediately pipetted into a 5uL volume  
453 coverslip flow chamber (constructed with double-stick tape, a glass slide and a 22x22mm  
454 coverslip). The slide was placed coverslip-side down into a humidity chamber for 20 minutes at  
455 room temperature to allow condensates to settle; reaction was then imaged. Multiple mounting  
456 strategies were explored, all yielding similar results. For condensates containing more than one  
457 protein, the molar ratio was always 1:1, unless otherwise indicated. Crowding agents were never  
458 used.

459

460 Partition coefficient measurements - Partition coefficient is defined as the difference in mean  
461 intensity of a condensate compared to background, i.e. apparent relative enrichment. The ‘Color  
462 Threshold’ (Otsu thresholding) and ‘Particle Analyzer’ functions on FIJI were used to identify and  
463 quantify condensate intensity, respectively. For each concentration, construct, and condition at  
464 least 100 condensates were analyzed. All statistical analysis and graph generation was carried out  
465 in MATLAB.

466

467 Live fall-down assay - A coverslip-bottomed CultureWell (Grace BioLabs: 112359) containing  
468 CSF-XB buffer with no salt was positioned and focused on a microscope and acquisition was  
469 started. 10x concentration of protein was diluted directly into the well to achieve a 1:9 dilution and  
470 a final salt concentration of 100mM. Time 00:00 (minutes:seconds) corresponds to the addition of  
471 the protein.

472

473 FRAP (Fluorescence Recovery After Photobleaching) – Condensates were prepared as in the live  
474 fall-down assay and allowed to settle for 5 minutes. Focus was set just above the coverslip and  
475 three Regions Of Interest (ROIs) of equal size and geometry were placed (1) within the condensate



476 to be photobleached, (2) the background, and (3) within a nearby condensate. Photobleaching was  
477 carried out and the intensity of each ROI recorded every second for the first 10 seconds and every  
478 10 seconds thereafter over a 10- to 20-minute acquisition. Recovery in the photobleached ROI was  
479 normalized to any changes in intensity in the background and nearby condensate ROI due to global  
480 bleaching. Global photobleaching in excess of 5% of the starting intensity was never observed. If  
481 the intensity in the nearby condensate ROI changed, that FRAP acquisition was discarded.

482  
483 *In vitro* MT Polymerization assay – Coverslip flow chamber was first blocked with  $\kappa$ -casein  
484 (Sigma: C0406-1G), and then coated with PEG-biotin (Rapp Polymere: 133000-25-20) and  
485 NeutrAvidin™ (ThermoFisher: A2666), each in BRB80 buffer (0.08 M Pipes, 0.001 M MgCl<sub>2</sub>,  
486 0.001 M EGTA, pH– 6.8), and with a BRB80 wash in between each step. Condensates containing  
487 tubulin and TPX2 were prepared as in the standard assay but in this case diluted into BRB80 buffer  
488 containing oxygen scavengers and 1 mM GTP for final salt concentration of 50 mM KCl and  
489 80mM Pipes. Final concentrations were 10  $\mu$ M bovine tubulin with 10% labeled Cy5-tubulin, 2%  
490 biotinylated-tubulin and 1  $\mu$ M GFP-TPX2. Condensate mixture was pipetted into the coverslip  
491 flow chamber and imaged.

492  
493 Measure of TPX2 soluble pool (i.e. phase boundary) – Condensates were prepared as in the  
494 standard assay at concentrations indicated and gel samples were prepared as inputs. Samples were  
495 spun at 80,000 RPM for 15min in a TLA100 rotor in an Optima MAX-XP Ultracentrifuge and gel  
496 samples were prepared from supernatants (soluble pool). Soluble pool sample concentrations were  
497 obtained via densitometry measurements of silver-stained SDS-PAGE.

498  
499 Phase boundary as a function of [salt] and [TPX2] - Condensates were prepared as in the standard  
500 assay at protein and salt concentrations indicated. A particular [salt]:[TPX2] condition was scored  
501 to have phase separated condensates if the average signal in apparent condensates was at least four  
502 times higher than background (i.e. partition coefficient  $\geq 4$ ). Conditions were scored to not contain  
503 condensates if they fell below this cutoff (only occurred in a three [salt]:[TPX2] conditions) or if  
504 no apparent condensates were observed (majority of cases).

505  
506 **Microtubule localization assays**



507 Concentration Series – 50 $\mu$ L of a dilute solution of GMPCPP-stabilized microtubules containing  
508 10% Alexa568-labeled tubulin were mixed with a 50 $\mu$ L solution of monodispersed TPX2 (GFP-  
509 tagged) and tubulin (Cy5Labeled), both at equal molar concentrations in 0.1M KCl CSF-XB buffer  
510 containing 1mM GTP. Mixture was immediately spun onto Poly-L-Lysine (Sigma: P8920) coated  
511 round coverslips through a 20% glycerol cushion at 12000 RMP in an HB-6 swinging bucket rotor  
512 using a Sorvall RC 6+ centrifuge. Coverslips were mounted with ProLong® Diamond Antifade  
513 Mountant (ThermoFisher: P36970), which was allowed to cure before imaging.

514

515 Localization of tubulin to MTs – Sample was prepared in the same way as the concentration  
516 series experiment. Protein mixtures contained equal molar concentrations of monodispersed  
517 proteins (TPX2, tubulin, BSA, and/or GFP, as indicated in figure legend).

518

519 Time Series of TPX2 localization - 80 $\mu$ L of a dilute solution of GMPCPP-stabilized microtubules  
520 containing 10% Alexa568-labeled tubulin and 10% biotinylated-tubulin were attached via anti-  
521 biotin antibodies adhered to the surface of a blocked ( $\kappa$ -casein) coverslip-bottomed CultureWell  
522 (Grace BioLabs: 112359). The microscope stage was positioned and focused on MTs, after which  
523 acquisition started. 10x concentration of mono-dispersed TPX2 was diluted directly into the well  
524 containing BRB80 buffer with 1mM GTP and oxygen scavengers to achieve 1X TPX2  
525 concentration and a final salt concentration of 50mM KCl and 80mM Pipes. Time 00:00  
526 corresponds the frame before any TPX2 signal is observed (approximately 5 seconds after the  
527 addition of protein).

528

529

### 530 ***Xenopus* egg cytosol assays**

531 Cytosol preparation – Cytosol naturally arrested in meiosis II was prepared as described in  
532 (Hannak and Heald, 2006). Briefly, stage VI (mature, meiotically arrested) *Xenopus laevis* eggs  
533 were collected after an overnight laying period. Eggs from individual frogs were kept separate but  
534 prepared in parallel, and typically 2-3 batches of eggs were used. Egg jelly coats were removed  
535 and cytosol was fractionated away from egg yolk, membranes, and organelles by centrifugation  
536 (10200 RPM in HB-6 for 15 minutes). Eggs were constantly maintained at 18°C via preparation  
537 in a temperature-controlled room. Undiluted cytosol was collected, supplemented with

538 Cytochalasin-D, protease inhibitors, ATP, and creatine phosphate and kept at 4°C until use. All  
539 reactions shown within a single image panel were acquired from the same cytosol preparation  
540 imaged in a single session.

541  
542 Extract overlaid onto condensates – 1 µL of TPX2 condensates, prepared as described in the  
543 standard assay, were pipetted onto the center of an untreated coverslip and overlaid with 5 µL  
544 *Xenopus* cytosol (containing mono-dispersed Alexa568-labeled tubulin). Extract overlay was  
545 carried out either immediately or after condensates were aged for the indicated amount of time  
546 (Fig. S2D-F). A slide was gently placed on top of the mixture, which marked the start of the  
547 reaction (time 0 sec). The sample was imaged via oblique-TIRF microscopy. Condensate and  
548 branched MT network mass in Figure S2B were calculated by creating fixed size convex hulls  
549 around each and conducting integrated intensity measurement across all frames.

550  
551 Immunodepletion – Preparation of *Xenopus* cytosol immunodepleted of TPX2 was prepared as  
552 described in (King and Petry, 2016). Briefly, immunoaffinity purified antibodies against TPX2 or  
553 an unspecific IgG control antibodies were conjugated to magnetic Dynabeads Protein A  
554 (ThermoFisher: 1002D) at 4°C overnight. Antibody-conjugated beads were split into two equal  
555 volume aliquots; supernatant was removed from one aliquot using a magnetic block and *Xenopus*  
556 cytosol was added. Beads were gently suspended in cytosol every 10 minutes for 40 minutes.  
557 Cytosol was removed from beads (using magnetic block) and then subjected to another round of  
558 depletion using the same procedure with the second aliquot of antibody-conjugated beads.  
559 Immunodepletion was assessed via functional assays.

560  
561 Branching MT nucleation assay – MT nucleation reactions were carried out as described in (King  
562 and Petry, 2016). Briefly, *Xenopus* cytosol was supplemented with fluorescently labeled tubulin  
563 ([1 µM] final) to visualize MTs, mCherry-fused End Binding protein 1 (EB1) ([100 nM] final) to  
564 track MT plus ends, and sodium orthovanadate ([0.5 µM] final) to inhibit motors and prevent MT  
565 gliding. Mono-dispersed purified TPX2 constructs (and other proteins) were added at specified  
566 concentrations. In the case of + nocodazole (Fig 1G), it was added at a final concentration of  
567 0.3mM. In experiments using immunodepleted cytosol (Figures 2 and 3) a constitutively active  
568 form of RanGTP (Ran<sup>Q69L</sup>) ([7.5µM] final) was added to prevent sequestration of TPX2 by

569 endogenous importins. In all experiments 0.1 M KCl CSF-XB buffer was used to match total  
570 dilution (25% of extract volume across all experiments). The reaction mixture was prepared on  
571 ice, then pipetted into a coverslip flow chamber at 18°C, which marked the start of the reaction.  
572 Reaction was imaged via TIRF microscopy for 20-40minutes. See ‘Analysis of branching MT  
573 nucleation’ section for details of time-lapse acquisitions. All reagents used were in 0.1 M KCl  
574 CSF-XB buffer.

575  
576 Analysis of branching MT nucleation – In all cases, at least three replicates of the concentration  
577 series for each construct was carried out. In these replicates, concentrations were tested in parallel  
578 on a single slide set-up with multiple flow chambers and imaged at time intervals of usually 30sec  
579 to 5min intervals over the course of 30 minutes. These intervals are longer than the 2 or 4 second  
580 time intervals that are shown in the main figures. In these replicate experiments, multiple  
581 constructs or concentrations could be assessed in parallel using a single cytosol prep, which has a  
582 finite lifetime (~several hours). These replicates served to verify the patterns observed in the time-  
583 lapse movies required for MT nucleation rate analysis - described below.

584 A custom MATLAB software (Thawani et al., 2018) was used to measure the number of  
585 MTs over time. EB1 signal on MT plus ends in the entire field of view was used to determine MT  
586 number within a single frame. EB1 detection was achieved via the plus-end tracking module of  
587 uTrack (Applegate et al., 2011) applied to the entire movie (typically 400-750 frames, 2 or 4  
588 seconds/frame). Parameters were optimized for each movie according to visual assessment of  
589 tracking accuracy. MT nucleation curves were generated by plotting the number of EB1 detections  
590 per frame over time. Branching MT nucleation rate is defined as the slope of the linear portion of  
591 the MT nucleation curve– i.e. the initial lag and eventually saturation are not used. In instances  
592 where branching MT nucleation was not observed (i.e. constant rate of de novo nucleation), rate  
593 corresponds to the slope of the entire MT nucleation curve. This quantification method is  
594 consistent with previous publications (Alfaro-Aco et al., 2017; Song et al., 2018; Thawani et al.,  
595 2018).

596 For each construct, a number of concentrations were quantified to generate MT nucleation  
597 rates within that series. Rates were normalized to the maximum rate within the series and plotted  
598 as a function of concentration. A logistic regression equation and the curve fitting tool in  
599 MATLAB were used to derive line of best fit. In these experiments, time-lapse movies (~30

600 minutes in duration) are acquired at 1 frame/2 or 4 seconds for each concentration, for each  
601 construct. Typically, 2 to 6 movies can be acquired per cytosol, given its lifetime. These movies  
602 are used to carry out MT nucleation rate analysis described above. For most constructs at least two  
603 independent concentration series and MT nucleation rate quantifications were carried out.  
604 Exceptions are IDR\_NoTB-CT-TPX2 and TB\_IDR-CT-TPX2, where a single concentration series  
605 (using time-lapse movies) and quantification was carried out. Note that all quantification of every  
606 construct was verified with at least three independent replicates (independent cytosol  
607 preparations), as mentioned above.

608

### 609 **Other analyses**

610 Prediction of protein disorder and secondary structure - Disorder prediction was carried out in  
611 IUPred (Dosztányi et al., 2005) which generates a per amino acid prediction of disorder on a  
612 scale of 0 to 1. This data was exported and converted into a heatmap using the heatmap function  
613 on MATLAB. Secondary structure predictions of TPX2 were carried out previously (Alfaro-  
614 Aco et al., 2017) .

615

616 Measure of TPX2 soluble pool (i.e. phase boundary) – Condensates were prepared as for the  
617 standard assay at concentrations indicated and gel samples were prepared as inputs. Samples were  
618 spun at 80,000 RPM for 15min in a TLA100 rotor in an Optima MAX-XP Ultracentrifuge and gel  
619 samples were prepared from supernatants (soluble pool). Soluble pool sample concentrations were  
620 obtained via densitometry measurements of silver stained SDS-PAGE.

621

622 Plots and graphics – All plots (graphs) were generated in MATLAB. All graphics were made in  
623 Adobe illustrator.

624

### 625 **Quantification and Statistical analysis**

626 All number or replicates (n) and statistical analyses are indicated in corresponding figure  
627 legends.

628

629 In vitro assays - For all *in vitro* assays, at least three independent replicate experiments were  
630 conducted. Either all quantifications are pooled and displayed, or quantifications from a single

631 representative experiment are shown, indicated in figure legend. In the latter cases (e.g. partition  
632 coefficient measurements) data presented corresponds to the images shown (if applicable).

633

634 *Xenopus* egg cytosol assays - All experiments using *Xenopus* egg cytosol were reproduced at  
635 least three times using separate cytosol preparations. Similar results were seen in all replicates.

636

## 637 **Experimental organisms Used**

### 638 ***E. Coli* Strains**

639 DH5 $\alpha$  cells were used for all subcloning steps.

640 Rosseta2 cells were used to express proteins for purification. Cells were grown at various volumes  
641 in LB Broth (Mentioned in Key resource table → Sigma: L3522) prepared according to supplier's  
642 instructions.

643

### 644 ***Xenopus leavis* frogs**

645 Mature (3 to 7-year-old) female *Xenopus leavis* frogs laid eggs that were used for cytosolic extract  
646 experiments. Animal housing, maintenance, and egg harvesting were all carried out to highest  
647 standards and in accordance to approved IACUC protocols and guidelines.

648

649



651 **References:**

- 652 Aguirre-Portolés, C., Bird, A.W., Hyman, A., Cañamero, M., Castro, I.P.d., and Malumbres, M.  
653 (2012). Tpx2 Controls Spindle Integrity, Genome Stability, and Tumor Development. *Cancer*  
654 *Res* 72, 1518-1528.
- 655 Alfaro-Aco, R., Thawani, A., and Petry, S. (2017). Structural analysis of the role of TPX2 in  
656 branching microtubule nucleation. *J Cell Biol* 216, 983-997.
- 657 Applegate, K.T., Besson, S., Matov, A., Bagonis, M.H., Jaqaman, K., and Danuser, G. (2011).  
658 plusTipTracker: Quantitative image analysis software for the measurement of microtubule  
659 dynamics. *Journal of Structural Biology* 176, 168-184.
- 660 Banani, S.F., Lee, H.O., Hyman, A.A., and Rosen, M.K. (2017). Biomolecular condensates:  
661 organizers of cellular biochemistry. *Nature Reviews Molecular Cell Biology* 18, 285-298.
- 662 Boija, A., Klein, I.A., Sabari, B.R., Dall’Agnese, A., Coffey, E.L., Zamudio, A.V., Li, C.H.,  
663 Shrinivas, K., Manteiga, J.C., Hannett, N.M., *et al.* (2018). Transcription Factors Activate Genes  
664 through the Phase-Separation Capacity of Their Activation Domains. *Cell* 175, 1842-  
665 1855.e1816.
- 666 Brunet, S., Dumont, J., Lee, K.W., Kinoshita, K., Hikal, P., Gruss, O.J., Maro, B., and Verlhac,  
667 M.-H. (2008). Meiotic Regulation of TPX2 Protein Levels Governs Cell Cycle Progression in  
668 Mouse Oocytes. *PLOS ONE* 3, e3338.
- 669 Brunet, S., Sardon, T., Zimmerman, T., Wittmann, T., Pepperkok, R., Karsenti, E., and Vernos, I.  
670 (2004). Characterization of the TPX2 Domains Involved in Microtubule Nucleation and Spindle  
671 Assembly in *Xenopus* Egg Extracts. *Mol Biol Cell* 15, 5318-5328.
- 672 Carter, S.L., Eklund, A.C., Kohane, I.S., Harris, L.N., and Szallasi, Z. (2006). A signature of  
673 chromosomal instability inferred from gene expression profiles predicts clinical outcome in  
674 multiple human cancers. *Nature Genetics* 38, 1043-1048.
- 675 Castellana, M., Wilson, M.Z., Xu, Y., Joshi, P., Cristea, I.M., Rabinowitz, J.D., Gitai, Z., and  
676 Wingreen, N.S. (2014). Enzyme clustering accelerates processing of intermediates through  
677 metabolic channeling. *Nature Biotechnology* 32, 1011.
- 678 Clarke, P.R., and Zhang, C. (2008). Spatial and temporal coordination of mitosis by Ran  
679 GTPase. *Nature Reviews Molecular Cell Biology* 9, 464-477.

- 680 Csizmok, V., Follis, A.V., Kriwacki, R.W., and Forman-Kay, J.D. (2016). Dynamic Protein  
681 Interaction Networks and New Structural Paradigms in Signaling. *Chem Rev* *116*, 6424-6462.
- 682 Decker, F., Oriola, D., Dalton, B., and Brugués, J. (2018). Autocatalytic microtubule nucleation  
683 determines the size and mass of *Xenopus laevis* egg extract spindles. *eLife Sciences* *7*, e31149.
- 684 Dosztányi, Z., Csizmok, V., Tompa, P., and Simon, I. (2005). IUPred: web server for the  
685 prediction of intrinsically unstructured regions of proteins based on estimated energy content.  
686 *Bioinformatics* *21*, 3433-3434.
- 687 Du, M., and Chen, Z.J. (2018). DNA-induced liquid phase condensation of cGAS activates  
688 innate immune signaling. *Science*, eaat1022.
- 689 Flor-Parra, I., Iglesias-Romero, A.B., and Chang, F. (2018). The XMAP215 Ortholog Alp14  
690 Promotes Microtubule Nucleation in Fission Yeast. *Current Biology* *28*, 1681-1691.e1684.
- 691 Gruss, O.J., Carazo-Salas, R.E., Schatz, C.A., Guarguaglini, G., Kast, J., Wilm, M., Le Bot, N.,  
692 Vernos, I., Karsenti, E., and Mattaj, I.W. (2001). Ran induces spindle assembly by reversing the  
693 inhibitory effect of importin alpha on TPX2 activity. *Cell* *104*, 83-93.
- 694 Gunzelmann, J., Rütznick, D., Lin, T.-c., Zhang, W., Neuner, A., Jäkle, U., and Schiebel, E.  
695 (2018). The microtubule polymerase Stu2 promotes oligomerization of the  $\gamma$ -TuSC for  
696 cytoplasmic microtubule nucleation. *eLife Sciences* *7*, e39932.
- 697 Hannak, E., and Heald, R. (2006). Investigating mitotic spindle assembly and function in vitro  
698 using *Xenopus laevis* egg extracts. *Nat Protoc* *1*, 2305-2314.
- 699 Hernández-Vega, A., Braun, M., Scharrel, L., Jahnel, M., Wegmann, S., Hyman, B.T., Alberti,  
700 S., Diez, S., and Hyman, A.A. (2017). Local Nucleation of Microtubule Bundles through Tubulin  
701 Concentration into a Condensed Tau Phase. *Cell Reports* *20*, 2304-2312.
- 702 Jiang, H., Wang, S., Huang, Y., He, X., Cui, H., Zhu, X., and Zheng, Y. (2015). Phase transition  
703 of spindle-associated protein regulate spindle apparatus assembly. *Cell* *163*, 108-122.
- 704 Kaye, B., Stiehl, O., Foster, P.J., Shelley, M.J., Needleman, D.J., and Fürthauer, S. (2018).  
705 Measuring and modeling polymer concentration profiles near spindle boundaries argues that  
706 spindle microtubules regulate their own nucleation. *New J Phys* *20*, 055012.



- 707 King, M., and Petry, S. (2016). Visualizing and Analyzing Branching Microtubule Nucleation  
708 Using Meiotic *Xenopus* Egg Extracts and TIRF Microscopy. In *The Mitotic Spindle* (Humana  
709 Press, New York, NY), pp. 77-85.
- 710 Li, P., Banjade, S., Cheng, H.-C., Kim, S., Chen, B., Guo, L., Llaguno, M., Hollingsworth, J.V.,  
711 King, D.S., Banani, S.F., *et al.* (2012). Phase transitions in the assembly of multivalent signalling  
712 proteins. *Nature* *483*, 336-340.
- 713 Ma, N., Tulu, U.S., Ferenz, N.P., Fagerstrom, C., Wilde, A., Wadsworth, P., and Zheng, Y.  
714 (2010). Poleward Transport of TPX2 in the Mammalian Mitotic Spindle Requires Dynein, Eg5,  
715 and Microtubule Flux. *Mol Biol Cell* *21*, 979-988.
- 716 Neumann, B., Walter, T., Hériché, J.-K., Bulkescher, J., Erfle, H., Conrad, C., Rogers, P., Poser,  
717 I., Held, M., Liebel, U., *et al.* (2010). Phenotypic profiling of the human genome by time-lapse  
718 microscopy reveals cell division genes. *Nature* *464*, 721-727.
- 719 Neumayer, G., Belzil, C., Gruss, O.J., and Nguyen, M.D. (2014). TPX2: of spindle assembly,  
720 DNA damage response, and cancer. *Cell Mol Life Sci* *71*, 3027-3047.
- 721 Oegema, K., Wiese, C., Martin, O.C., Milligan, R.A., Iwamatsu, A., Mitchison, T.J., and Zheng,  
722 Y. (1999). Characterization of Two Related *Drosophila*  $\gamma$ -tubulin Complexes that Differ in Their  
723 Ability to Nucleate Microtubules. *The Journal of Cell Biology* *144*, 721-733.
- 724 Oh, D., Yu, C.-H., and Needleman, D.J. (2016). Spatial organization of the Ran pathway by  
725 microtubules in mitosis. *PNAS* *113*, 8729-8734.
- 726 Petry, S. (2016). Mechanisms of Mitotic Spindle Assembly. *Annual Review of Biochemistry* *85*,  
727 659-683.
- 728 Petry, S., Groen, Aaron C., Ishihara, K., Mitchison, Timothy J., and Vale, Ronald D. (2013).  
729 Branching Microtubule Nucleation in *Xenopus* Egg Extracts Mediated by Augmin and TPX2.  
730 *Cell* *152*, 768-777.
- 731 Roostalu, J., Cade, N.I., and Surrey, T. (2015). Complementary activities of TPX2 and chTOG  
732 constitute an efficient importin-regulated microtubule nucleation module. *Nat Cell Biol* *17*,  
733 1422-1434.

- 734 Schatz, C.A., Santarella, R., Hoenger, A., Karsenti, E., Mattaj, I.W., Gruss, O.J., and Carazo-  
735 Salas, R.E. (2003). Importin alpha-regulated nucleation of microtubules by TPX2. *EMBO J* 22,  
736 2060-2070.
- 737 Scrofani, J., Sardon, T., Meunier, S., and Vernos, I. (2015). Microtubule nucleation in mitosis by  
738 a RanGTP-dependent protein complex. *Curr Biol* 25, 131-140.
- 739 Shin, Y., and Brangwynne, C.P. (2017). Liquid phase condensation in cell physiology and  
740 disease. *Science* 357, eaaf4382.
- 741 Song, J.-G., King, M.R., Zhang, R., Kadzik, R.S., Thawani, A., and Petry, S. (2018). Mechanism  
742 of how augmin directly targets the  $\gamma$ -tubulin ring complex to microtubules. *J Cell Biol*,  
743 jcb.201711090.
- 744 Strulson, C.A., Molden, R.C., Keating, C.D., and Bevilacqua, P.C. (2012). RNA catalysis  
745 through compartmentalization. *Nature Chemistry* 4, 941.
- 746 Su, X., Ditlev, J.A., Hui, E., Xing, W., Banjade, S., Okrut, J., King, D.S., Taunton, J., Rosen,  
747 M.K., and Vale, R.D. (2016). Phase separation of signaling molecules promotes T cell receptor  
748 signal transduction. *Science*, aad9964.
- 749 Tan, S., Kern, R.C., and Selleck, W. (2005). The pST44 polycistronic expression system for  
750 producing protein complexes in *Escherichia coli*. *Protein Expression and Purification* 40, 385-  
751 395.
- 752 Thawani, A., Kadzik, R.S., and Petry, S. (2018). XMAP215 is a microtubule nucleation factor  
753 that functions synergistically with the  $\gamma$ -tubulin ring complex. *Nat Cell Biol* 20, 575-585.
- 754 Tovey, C.A., and Conduit, P.T. (2018). Microtubule nucleation by  $\gamma$ -tubulin complexes and  
755 beyond. *Essays In Biochemistry*, EBC20180028.
- 756 Tulu, U.S., Fagerstrom, C., Ferenz, N.P., and Wadsworth, P. (2006). Molecular Requirements for  
757 Kinetochore-Associated Microtubule Formation in Mammalian Cells. *Curr Biol* 16, 536-541.
- 758 Wang, G., Wang, Q., Li, Z., Liu, C., and He, X. (2018). Clinical value of *Xenopus* kinesin-like  
759 protein 2 as a prognostic marker in patients with digestive system cancers: a systematic review  
760 and meta-analysis. *Onco Targets Ther* 11, 1229-1243.

- 761 Woodruff, J.B., Ferreira Gomes, B., Widlund, P.O., Mahamid, J., Honigmann, A., and Hyman,  
762 A.A. (2017). The Centrosome Is a Selective Condensate that Nucleates Microtubules by  
763 Concentrating Tubulin. *Cell* 169, 1066-1077.e1010.
- 764 Wühr, M., Freeman, R.M., Presler, M., Horb, M.E., Peshkin, L., Gygi, S.P., and Kirschner,  
765 M.W. (2014). Deep proteomics of the *Xenopus laevis* egg using an mRNA-derived reference  
766 database. *Curr Biol* 24, 1467-1475.
- 767 Zhao, H., Chiaro, C.R., Zhang, L., Smith, P.B., Chan, C.Y., Pedley, A.M., Pugh, R.J., French,  
768 J.B., Patterson, A.D., and Benkovic, S.J. (2015). Quantitative Analysis of Purine Nucleotides  
769 Indicates That Purinosomes Increase de Novo Purine Biosynthesis. *J Biol Chem* 290, 6705-6713.
- 770 Zheng, Y., Wong, M.L., Alberts, B., and Mitchison, T. (1995). Nucleation of microtubule  
771 assembly by a  $\gamma$ -tubulin-containing ring complex. *Nature* 378, 578-583.
- 772
- 773

774 **Acknowledgments:** We thank members of the Petry Lab for helping with this work, including  
775 Ray Alfaro-Aco, Michael Rale, Mohomad Safari, and Akanksha Thawani. We are especially  
776 grateful to Cliff Brangwynne for experimental suggestions and the Petry Lab, Ibrahim Cisse and  
777 Kassandra Ori-McKenney for feedback on the manuscript. This work was supported by Ph.D.  
778 training grant T32GM007388 by NIGMS of the National Institutes of Health (to M.R. King), as  
779 well as the New Innovator Award of NIGMS of the National Institutes of Health (DP2), the Pew  
780 Scholars Program in the Biomedical Sciences, and the David and Lucile Packard Foundation (all  
781 to S. Petry).

782 **Author contributions:** M.R.K. and S.P. conceived the project, designed the experiments, and  
783 wrote the manuscript. M.R.K. generated and characterized reagents and tools, and performed and  
784 analyzed experiments.

785 **Declaration of interests:** Authors declare no competing interests.

786

787

788 **Supplemental Information:**

789

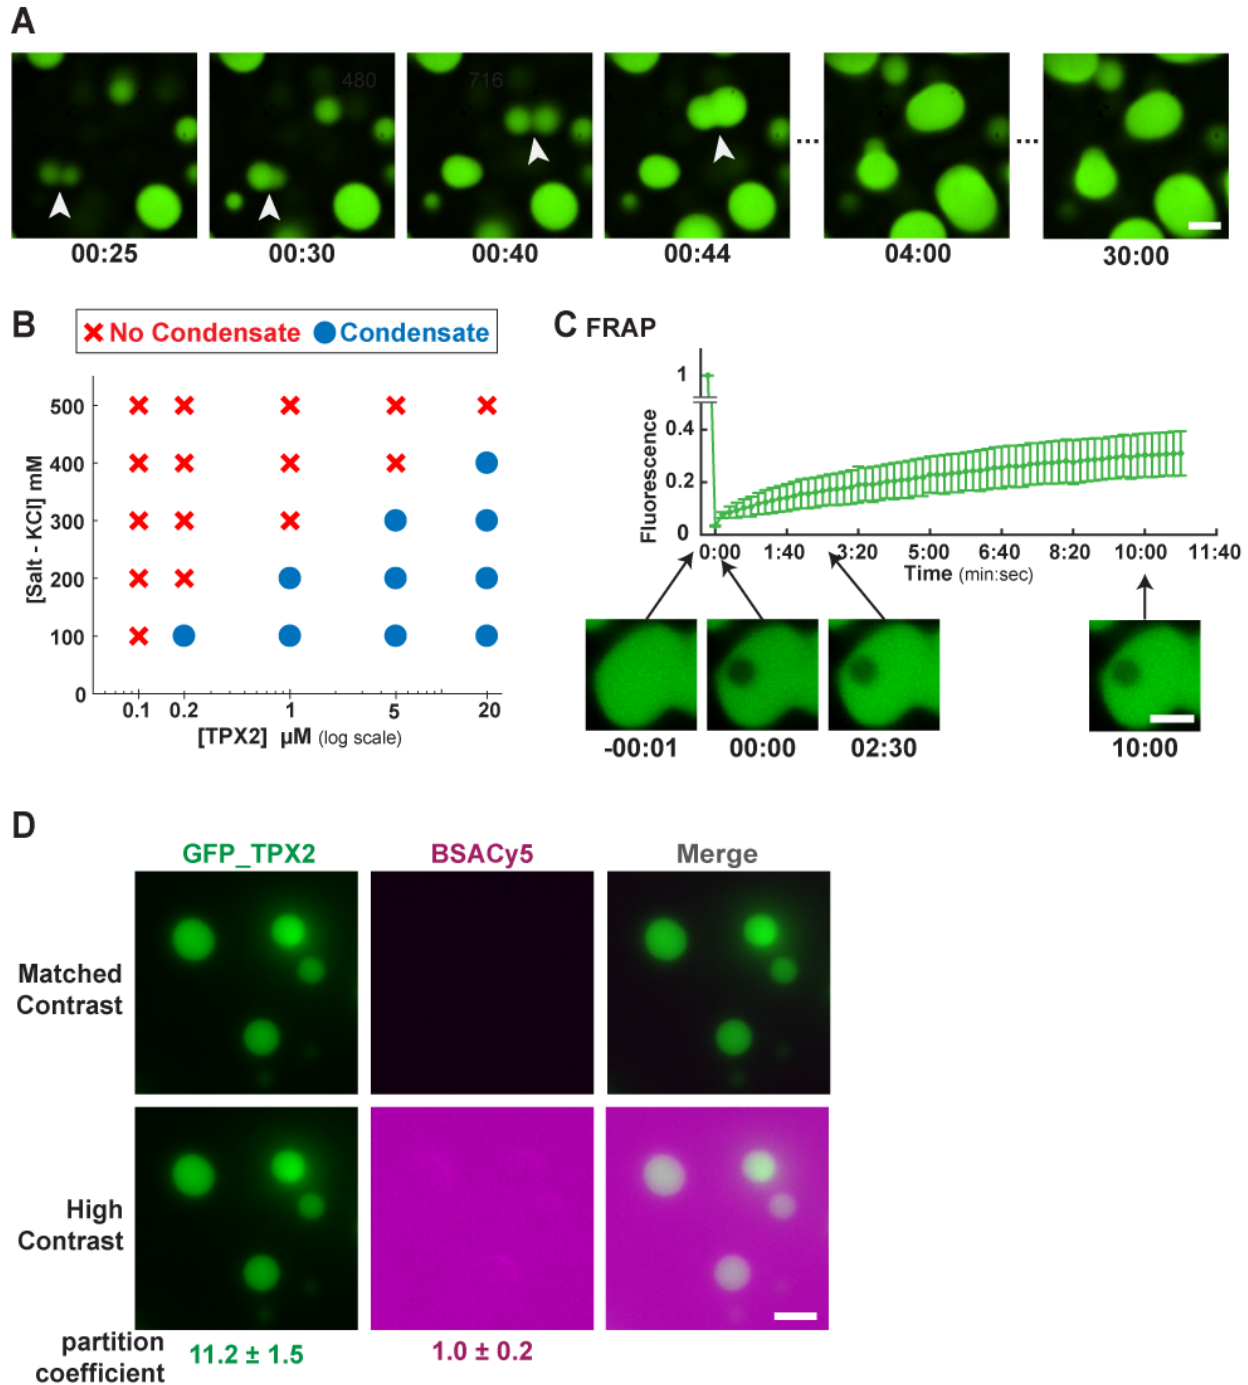

790

791

792 **Fig. S1. TPX2 phase separates into a liquid-like condensate**

793 (A) Confocal microscopy images of GFP-TPX2 condensates falling and fusing in a coverslip-

794 bottomed well. Select frames from time-course movie shown. 00:00 (minutes:seconds)

795 corresponds to when GFP-TPX2 was added to the well. Arrowheads indicate fusion events. GFP-

796 TPX2 at 20μM. Scale bar, 3μm. (B) Phase diagram of GFP-TPX2 at indicated salt (mM) and

797 protein (μM) concentrations. Blue circles indicate presence and red crosses indicate absence of

798 condensates (pseudo-colored green), acquired via confocal microscopy. Mean and SEM of three  
799 replicate experiments (error bars) shown. Example images shown immediately before (-00:01) and  
800 after photobleaching (00:01). Also shown are two time-points into recovery. Scale bar, 3 $\mu$ m. **(D)**  
801 Epifluorescent image of GFP-TPX2 condensates prepared with Cy5-labeled BSA, both at 4  $\mu$ M.  
802 Scale bar, 3 $\mu$ m. In upper panel the contrast is matched to main figure 1C, and enhanced in the  
803 lower panel to illustrate the absence of BSA enrichment. Partition coefficient value is the mean  
804 with  $\pm 1$  standard deviation (SD) computed from at least 100 condensates in an experimental set.  
805

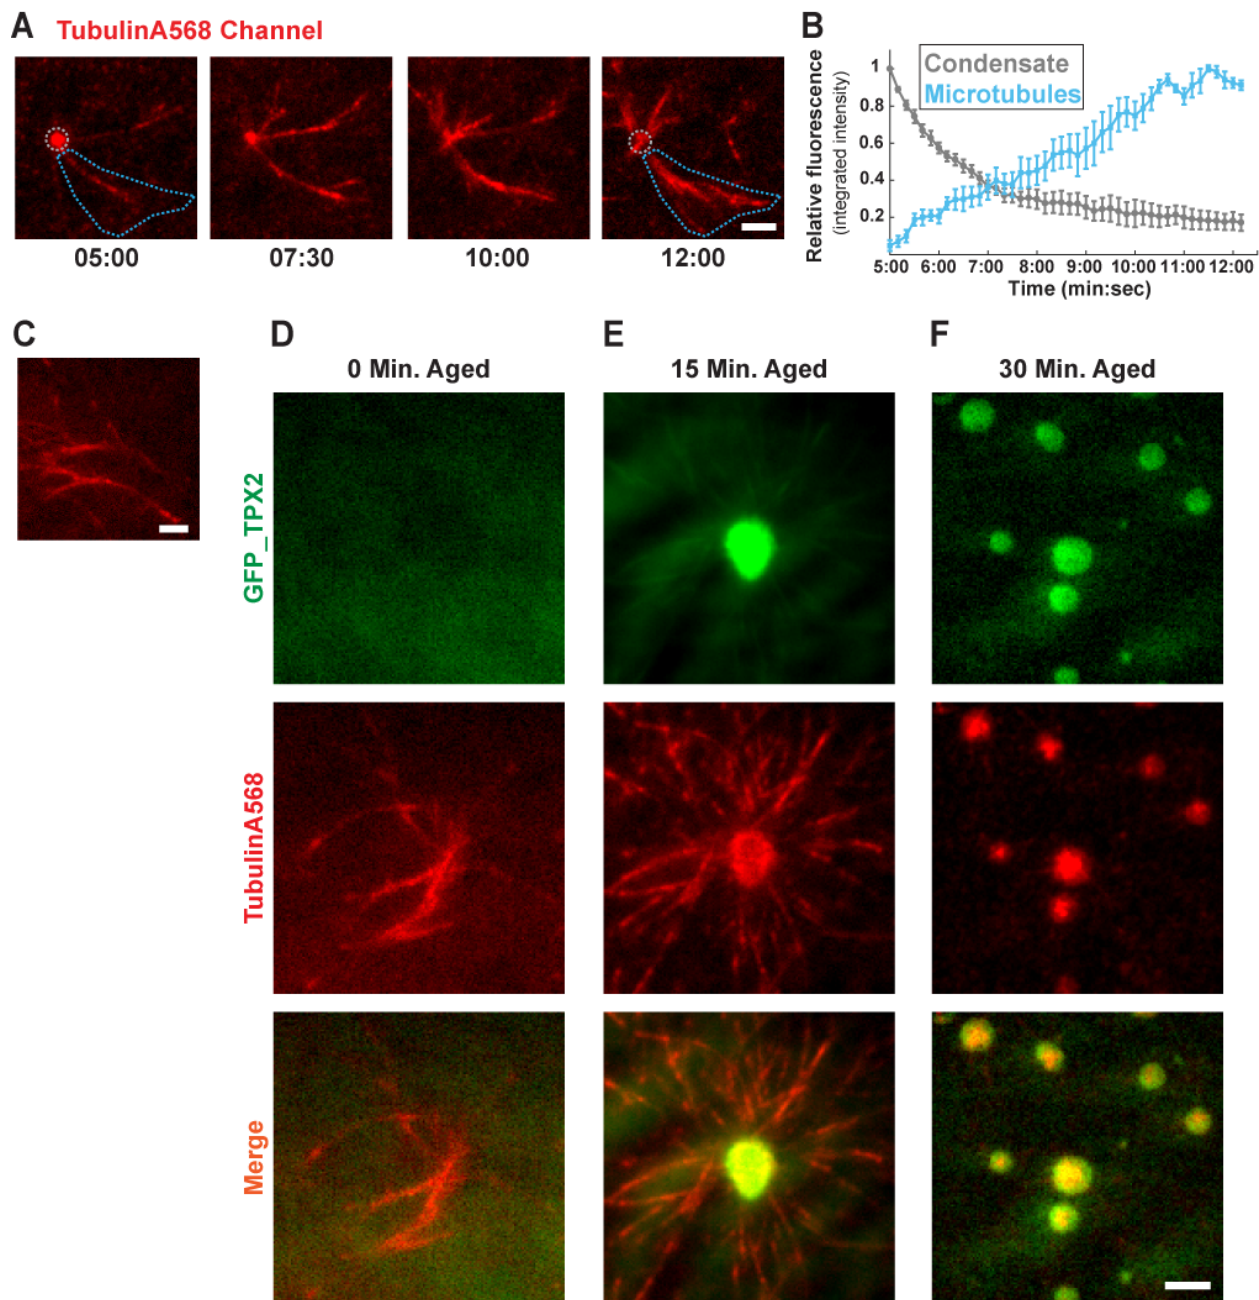

806

807 **Fig. S2. TPX2 condensate age affects MT nucleation.**

808 (A) In the same experiment shown in Fig. 1I, the tubulin channel imaged over time  
809 (minutes:seconds) and depicted. (B) Quantification of integrated tubulin signal from indicated  
810 areas corresponding to initial condensates (grey) and MT fan structures (blue). Mean values shown  
811 as circles with  $\pm 1$  SD shown as error bars from five separate analyses. (C) An alternate field from  
812 same experiment as Fig. 1I and Sup. Fig. 2A at 15 minutes into the reaction. Scale bar, 3  $\mu$ m. GFP-  
813 TPX2 condensates aged for (D) 0 minutes (E) 15 minutes and (F) 30 minutes were overlaid with  
814 cytosol containing mono-dispersed Alexa568-labeled tubulin (see schematic in Fig. 1H). Images  
815 acquired via oblique TIRF microscopy 20 minutes after sample preparation. GFP-TPX2 and  
816 tubulin (Alexa568-labeled) channels and merge shown. TPX2 at 2  $\mu$ M; scale bar, 3  $\mu$ m.



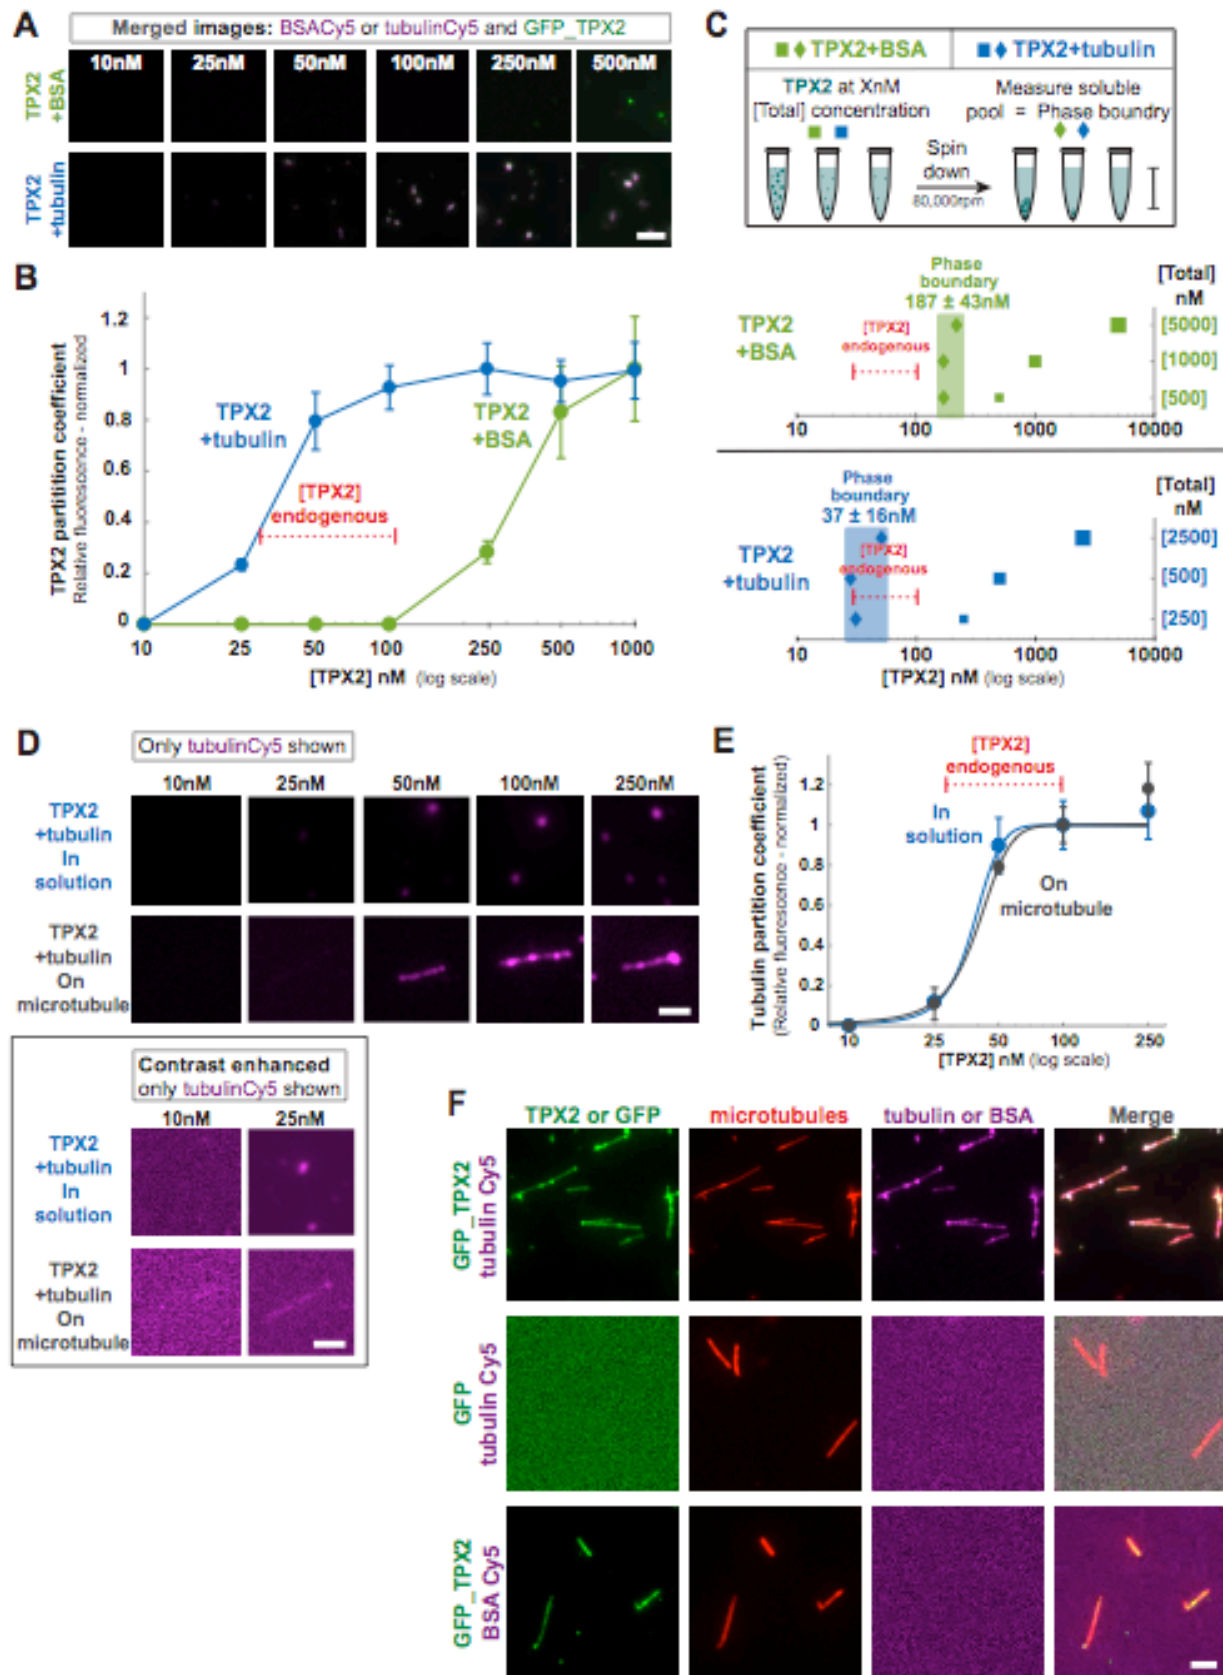



818 **Fig. S3. The phase boundary of TPX2 is lowered by tubulin, and TPX2-tubulin co-**  
819 **condensates specifically form on microtubules.**

820 **(A)** Epifluorescent images of TPX2 condensates with BSA and TPX2-tubulin co-condensates *in*  
821 *vitro*. BSA, tubulin, and TPX2 are equimolar at indicated concentrations. Scale bar, 2 $\mu$ m. **(B)**  
822 Graph of partition coefficient of GFP-TPX2 normalized to the maximum partition coefficient  
823 among the concentrations shown. Mean values shown as circles with  $\pm 1$  SD shown as error bars  
824 for condensates formed in the presence of BSA (green) or tubulin (blue) and plotted as a function  
825 of concentration. At least 100 condensates per concentration were analyzed. Endogenous  
826 concentration range of TPX2 (30-100 nM) indicated. **(C)** Schematic of method used to determine  
827 soluble concentration of GFP-TPX2 at various total concentrations in the presence of BSA and  
828 tubulin. Total concentration (squares) is indicated on the Y-axis and the corresponding soluble  
829 pool measurement (diamonds) is indicated on the same plane. Mean soluble pool concentrations  
830 of three replicate experiments shown. Phase boundary value is the mean SEM of all soluble pool  
831 replicates. **(D)** Oblique TIRF images of only Cy5-labeled tubulin condensed with GFP-TPX2 (not  
832 shown) either in solution (top panel) or on a pre-formed MT (lower panel – MT not shown) at  
833 concentrations shown. Images displayed at matched brightness and contrast. Enhanced contrast of  
834 10nM and 25nM images shown in shown in box. Scale bar, 2 $\mu$ m. **(E)** Quantification of relative  
835 tubulin signal from TPX2-tubulin co-condensates in solution (blue curve) and on microtubules  
836 (purple curve) at concentrations shown in (E). Mean and SEM of three replicate experiments (error  
837 bars) shown. Endogenous concentration range of TPX2 (30-100 nM) indicated. **(F)** Oblique TIRF  
838 images (larger fields of view than shown in Fig. 2A) of pre-formed MTs (stabilized with GMPCPP  
839 and labeled with Alexa568) in the presence of GFP-TPX2 and Cy5-labeled tubulin (upper panel),  
840 GFP and Cy5-labeled tubulin (middle panel), or GFP-TPX2 and Cy5-labeled BSA (lower panel).  
841 Note that tubulin (Cy5-labeled) does not bind to MTs (Alexa568-labeled) unless GFP-TPX2 is  
842 present. Contrast is maximized in these images. All proteins at equimolar concentration (100 nM).  
843 Scale bar, 3 $\mu$ m.

844

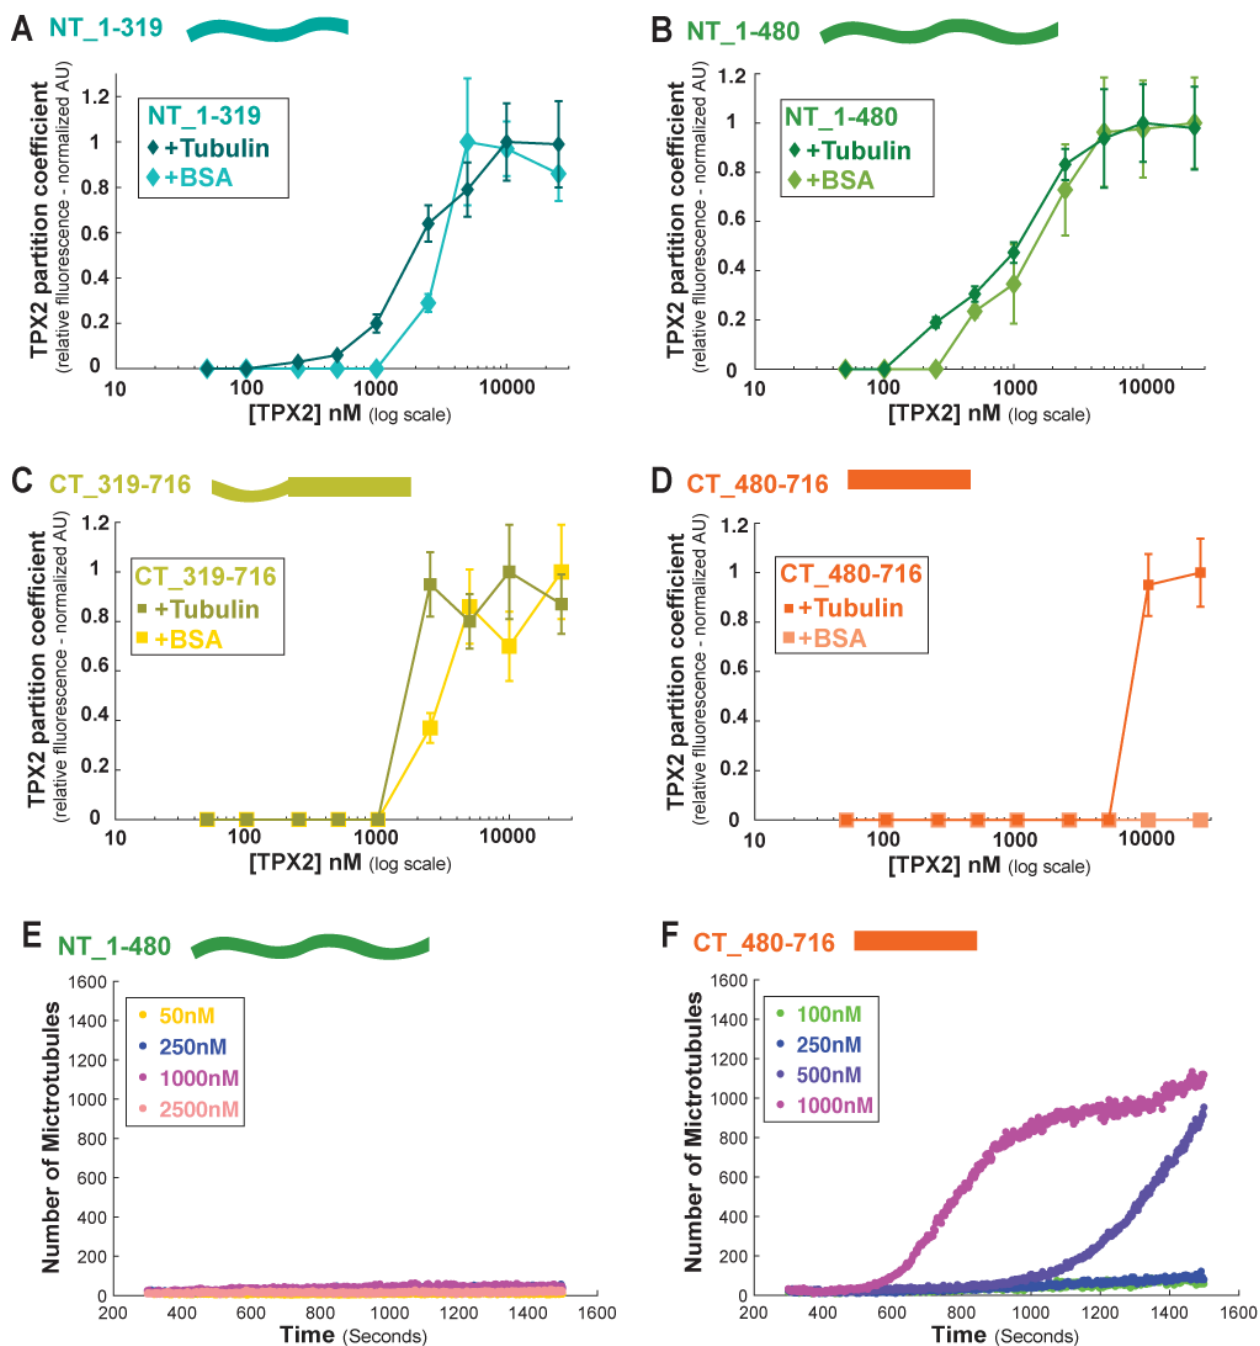

845  
 846 **Fig. S4. Partition coefficients of TPX2 truncation constructs and their MT nucleation**  
 847 **ability.**  
 848 Partition coefficients of GFP\_TPX2 in +BSA and +tubulin conditions for the constructs (A)  
 849 NT\_1-319, (B) NT\_1-480, (C) CT\_319-716, (D) CT\_480-716. Mean values with  $\pm 1$  SD as error  
 850 bars shown. At least 100 condensates per concentration and condition were analyzed. Total  
 851 number of MTs generated over time for (E) NT\_1-480 TPX2 and (F) CT\_480-716 TPX2.  
 852 Measurements taken at various concentrations of TPX2 (shown in figure).

853  
 854  
 855

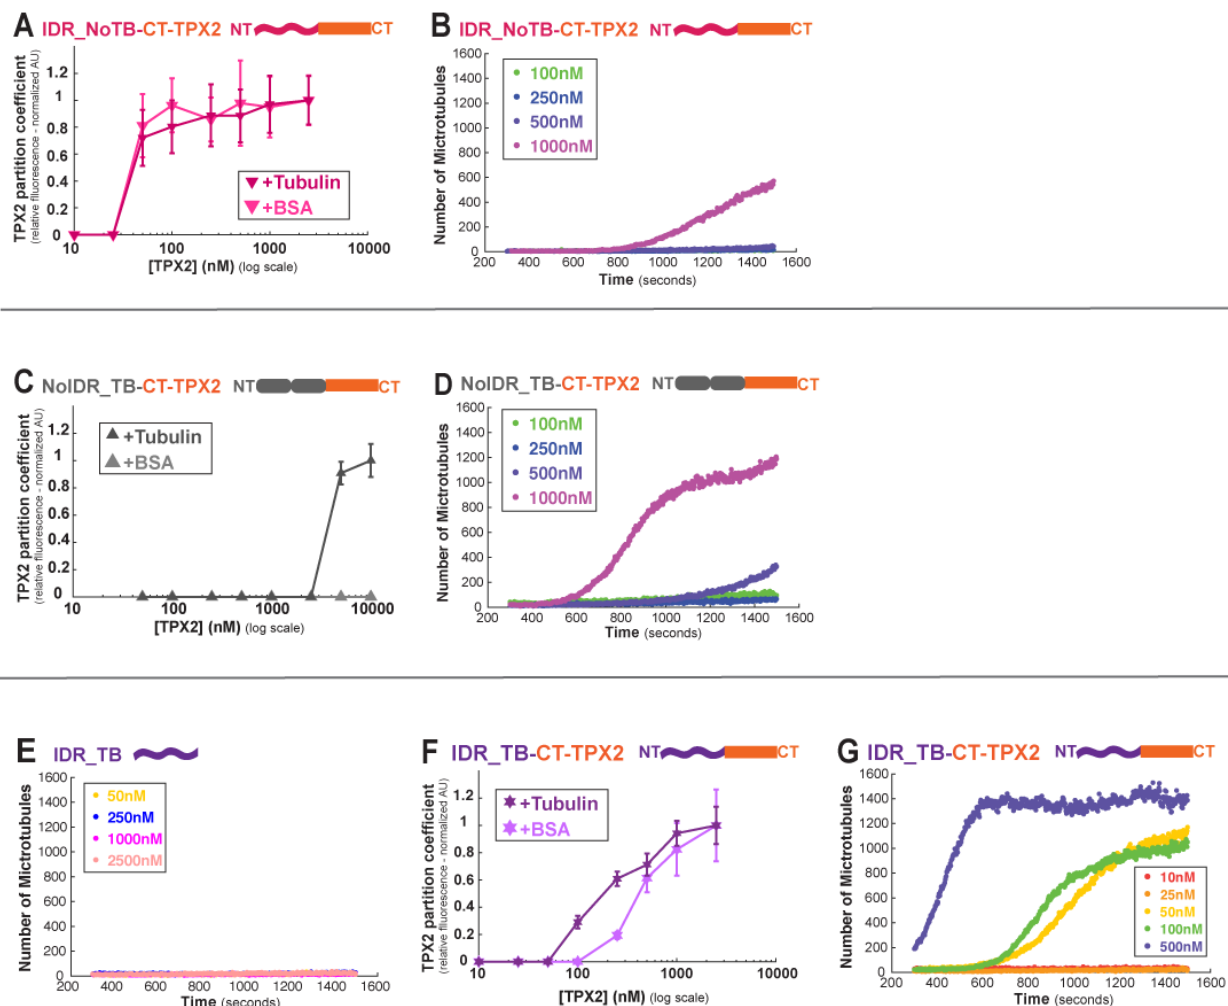

856  
 857 **Fig. S5. Partition coefficients and MT nucleation rate curves of TPX2 chimera constructs**  
 858 (A) Partition coefficients of GFP\_TPX2 in +BSA and +tubulin and (B) total number of MTs  
 859 generated over time for IDR\_NoTB-CT-TPX2. (C) Partition coefficients of GFP\_TPX2 in +BSA  
 860 and +tubulin and (D) total number of MTs generated over time for NoIDR\_TB-CT-TPX2.  
 861 IDR\_NoTB-CT-TPX2. (E) Partition coefficients of GFP\_TPX2 in +BSA and +tubulin and (F)  
 862 total number of MTs generated over time for IDR\_TB-CT-TPX2. (G) Total number of MTs  
 863 generated over time for IDR\_TB. For partition coefficient graphs mean values with  $\pm 1$  SD as error  
 864 bars shown and at least 100 condensates per concentration were analyzed. For both types of graph,  
 865 measurements were taken at various concentrations of TPX2 and are shown in figure.

866  
 867

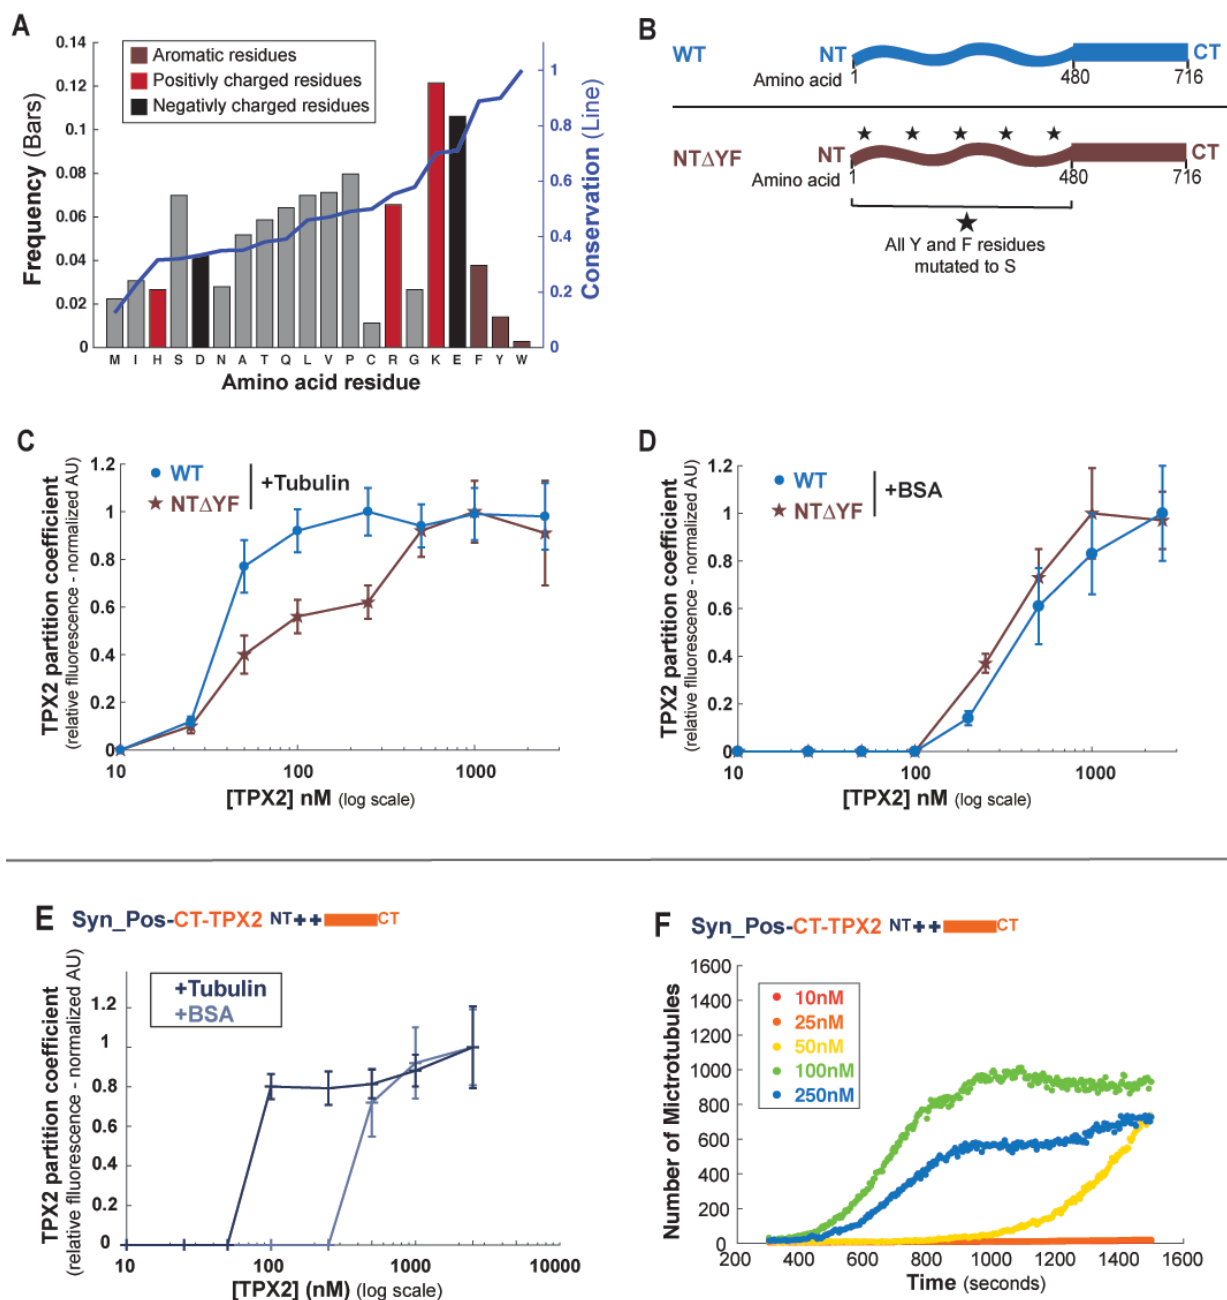

868  
 869 **Fig. S6. Positively charged residues in TPX2 drive co-condensation with tubulin**  
 870 (A) Graph of amino acids composition of *Xenopus* TPX2. Bars (black borders - left y-axis)  
 871 displays relative amino acid frequency and line (blue - right y-axis) shows percent conservation  
 872 of each amino acid type relative to Human TPX2. Amino acids are ordered from least to most  
 873 conserved and colored (see key). Note that aromatic residues are the most conserved amino acid  
 874 type, followed by electrostatic residues that are highly conserved and abundant (Lysine –K –  
 875 being the most abundant). (B) Schematic of full length and NTΔYF constructs. Partition  
 876 coefficients of GFP TPX2 for full length and NTΔYF shown (C) +Tubulin and (D) +BSA. (E)  
 877 Partition coefficients of GFP\_TPX2 in +BSA and +tubulin and (F) total number of MTs  
 878 generated over time for Syn\_Pos-CT-TPX2. For partition coefficient graphs mean values with  
 879 ±1 SD as error bars shown and at least 100 condensates per concentration were analyzed. For

880 both types of graph, measurements were taken at various concentrations of TPX2 and are shown  
881 in figure.

882

883

884

885

886 **Movie S1.**

887 GFP\_TPX2 condensates falling and fusing on coverslips movie corresponds to Fig. S1

888

889 **Movie S2.**

890 Mono-dispersed GFP\_TPX2 (green) localizing to emerging MT fan networks that are marked with  
891 Cy5-tubulin (red) and the plus-tip tracking protein EB1 (Blue). Reaction in *Xenopus* egg cytosol  
892 treated. Frames were acquired every 10 seconds. Movie corresponds to Fig. 1H.

893

894 **Movie S3.**

895 GFP\_TPX2 and Cy5-tubulin co-condensates in *Xenopus* egg cytosol treated with nocodazole to  
896 prevent microtubule polymerization. Frames were acquired at the fastest possible rate (one frame  
897 per 0.1 seconds) but the rapid dynamics of the co-condensates often lead to an offset in the overlap  
898 of their signal (merge channel). Movie corresponds to Fig. 1I.

899

900 **Movie S4.**

901 TPX2-mediated branching MT nucleation in *Xenopus* meiotic cytosol at indicated concentrations  
902 of TPX2. Cy5-labeled tubulin (red) and EB1-mCherry (green) highlight microtubules and growing  
903 microtubule plus ends, respectively. Movie corresponds to Fig. 2C-E.

904

905 **Movie S5.**

906 TPX2-mediated branching MT nucleation in *Xenopus* meiotic cytosol at indicated concentrations  
907 of NT\_1-480 TPX2 (top row) and CT\_480-716 TPX2 (bottom row). Cy5-labeled tubulin (red) and  
908 EB1-mCherry (green) highlight microtubules and growing microtubule plus ends, respectively.  
909 Movie corresponds to Fig. 3D and S4E-H.

910

911 **Movie S6.**

912 TPX2-mediated branching MT nucleation in *Xenopus* meiotic cytosol at indicated concentrations  
913 of IDR\_NoTB-CT-TPX2 (top row) and NoIDR\_TB-CT-TPX2 (bottom row). Cy5-labeled tubulin  
914 (red) and EB1-mCherry (green) highlight microtubules and growing microtubule plus ends,  
915 respectively. Movie corresponds to Fig. 4C and S5B and D.

916

917 **Movie S7.**

918 TPX2-mediated branching MT nucleation in *Xenopus* meiotic cytosol at indicated concentrations  
919 of IDR\_TB-CT-TPX2 (top row) and Syn\_Pos-CT-TPX2 (bottom row). Cy5-labeled tubulin (red)  
920 and EB1-mCherry (green) highlight microtubules and growing microtubule plus ends,  
921 respectively. Movie corresponds to Fig. 4C and S5F and S6F.

922

923 **Movie S8.**

924 TPX2-mediated branching MT nucleation in *Xenopus* meiotic cytosol at indicated fold excess of  
925 importins- $\alpha/\beta$ . Full-length TPX2 at final concentration of 100nM. Cy5-labeled Tubulin (red) and  
926 EB1-mCherry (green) highlight microtubules and growing microtubule plus ends, respectively.  
927 Movie corresponds to Fig. 5B-C and E.

928

929
